# Supplementary material for: Genomic variations and epigenomic landscape of the Medaka Inbred Kiyosu-Karlsruhe (MIKK) panel
Source: bioRxiv or medRxiv preprint supplement (doi:10.1101/2021.05.17.444424), 2021-05-21

Karyotype of normalised coverage for reference HDRR with line 4-1

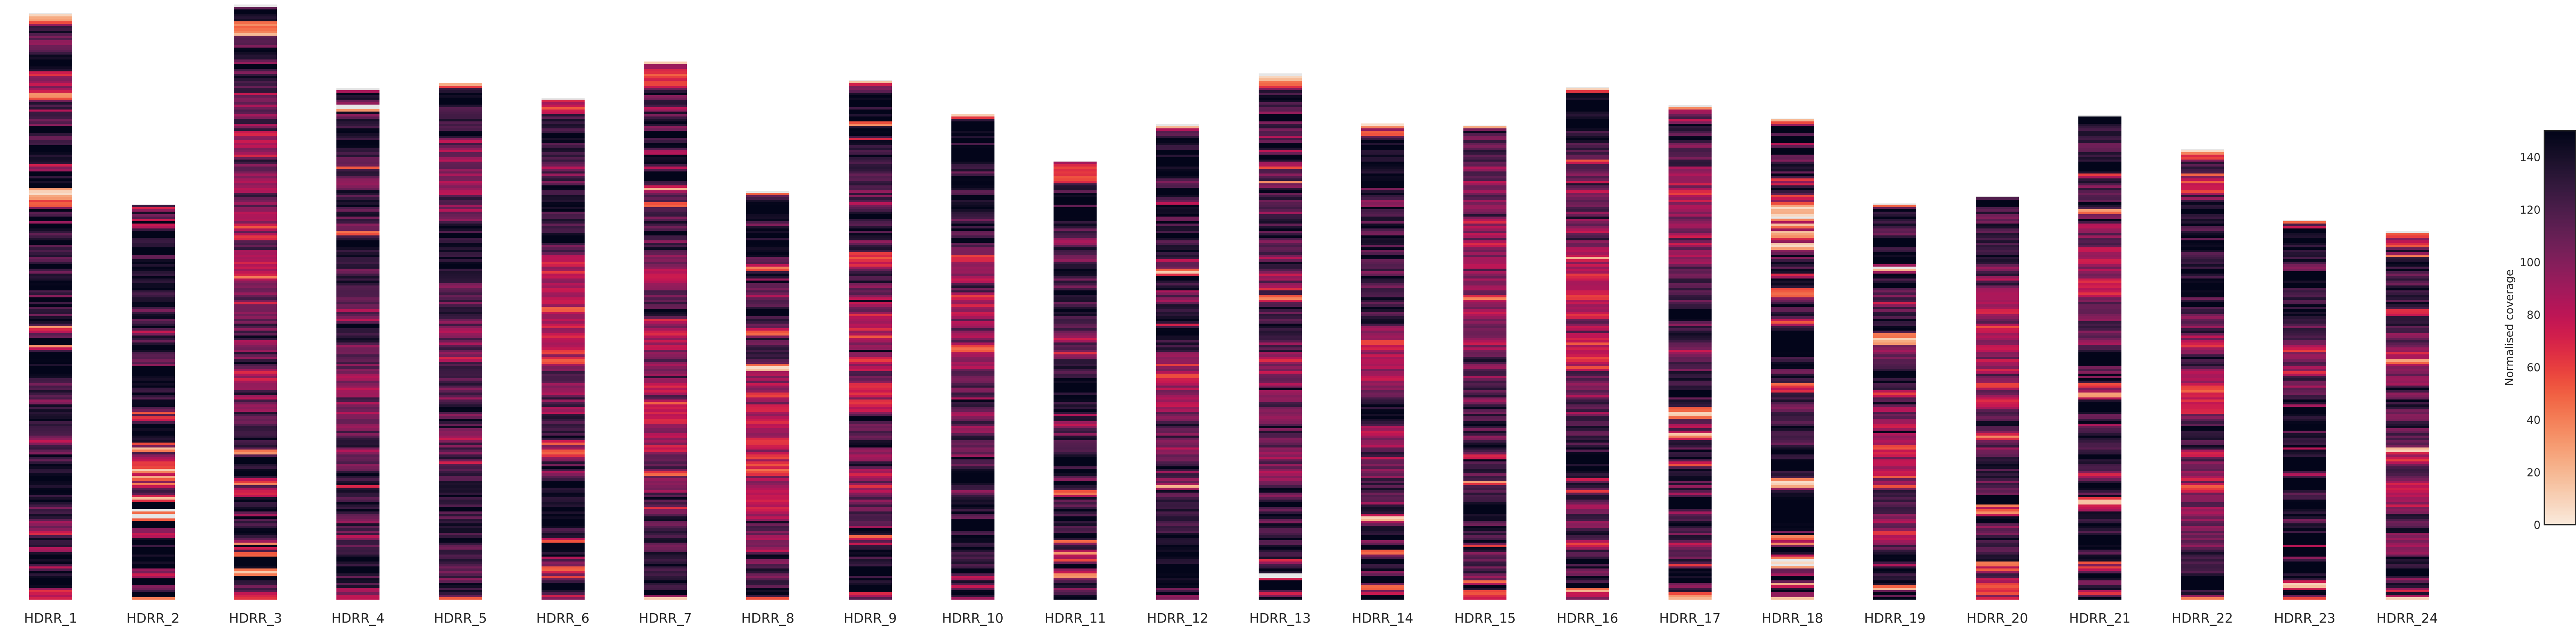

Karyotype of normalised coverage for reference HDRR with line 4-2

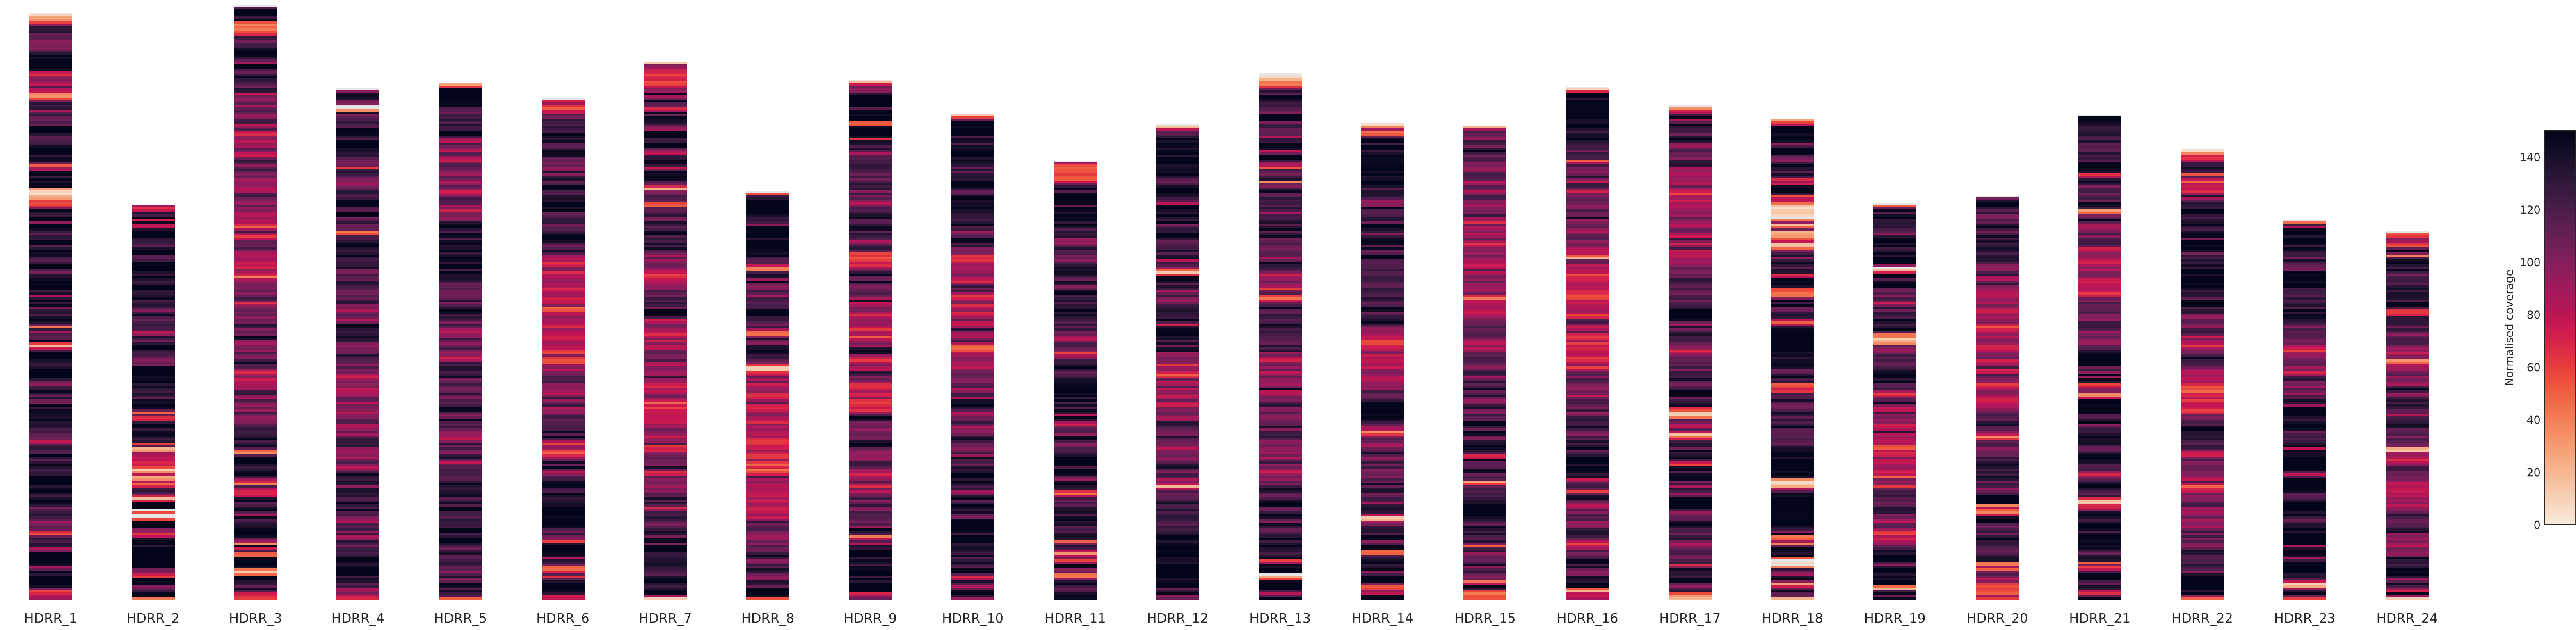

Karyotype of normalised coverage for reference HDRR with line 7-1

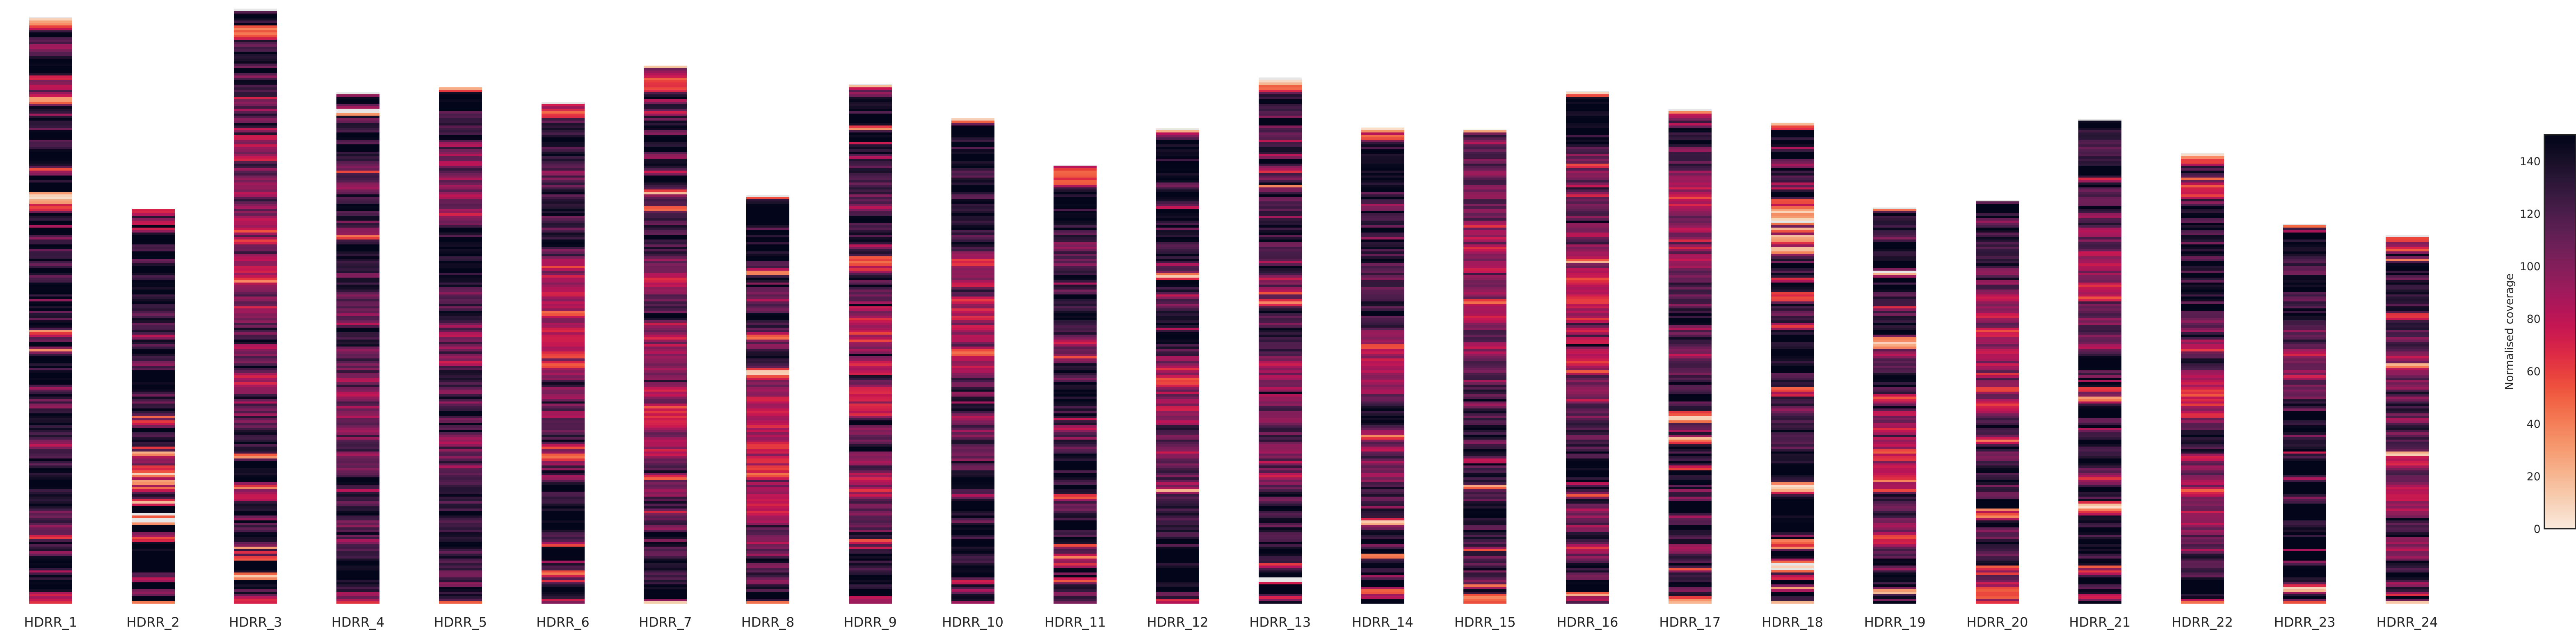

Karyotype of normalised coverage for reference HDRR with line 7-2

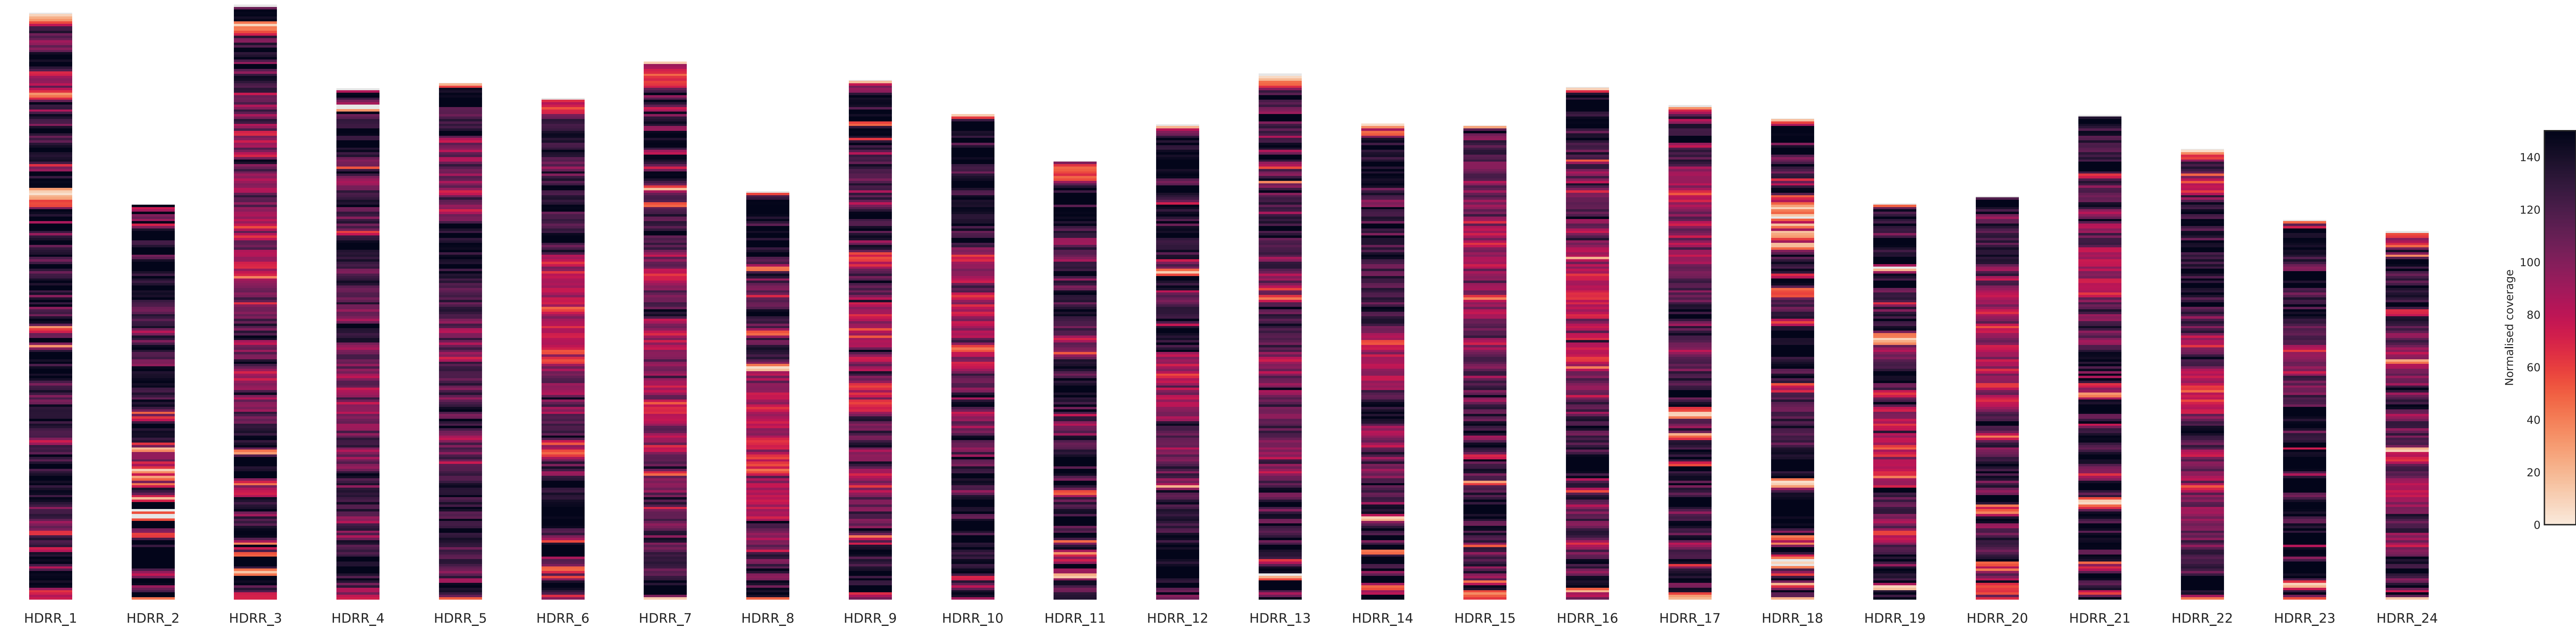

Karyotype of normalised coverage for reference HDRR with line 11-1

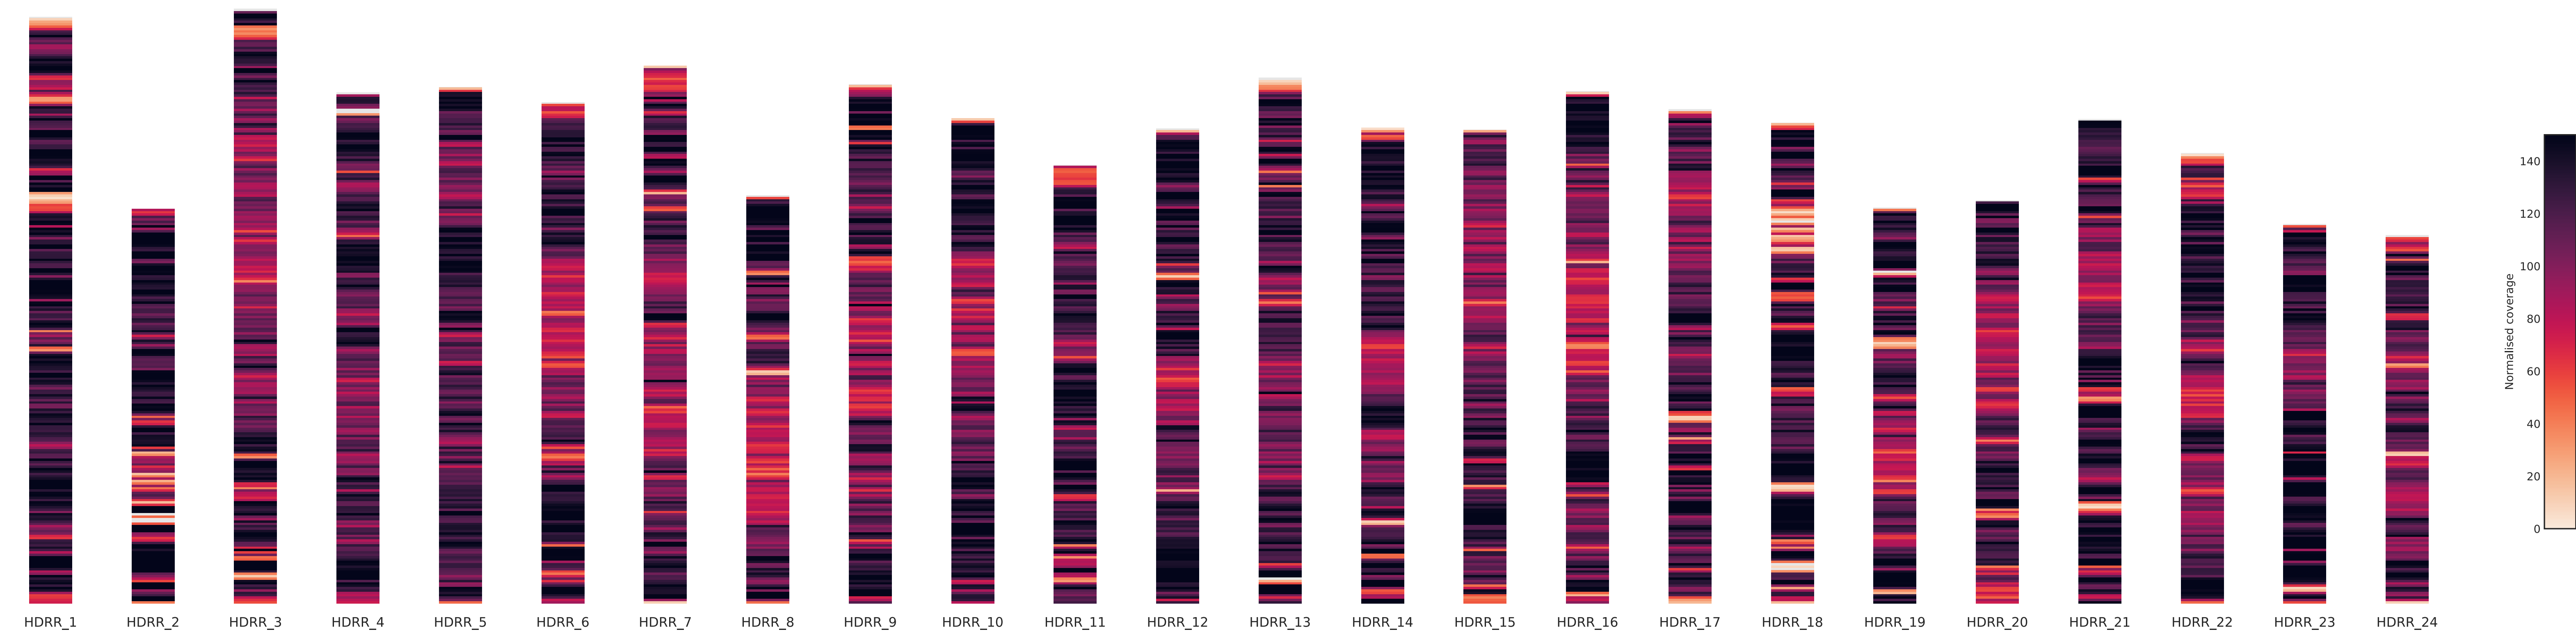

Karyotype of normalised coverage for reference HDRR with line 69-1

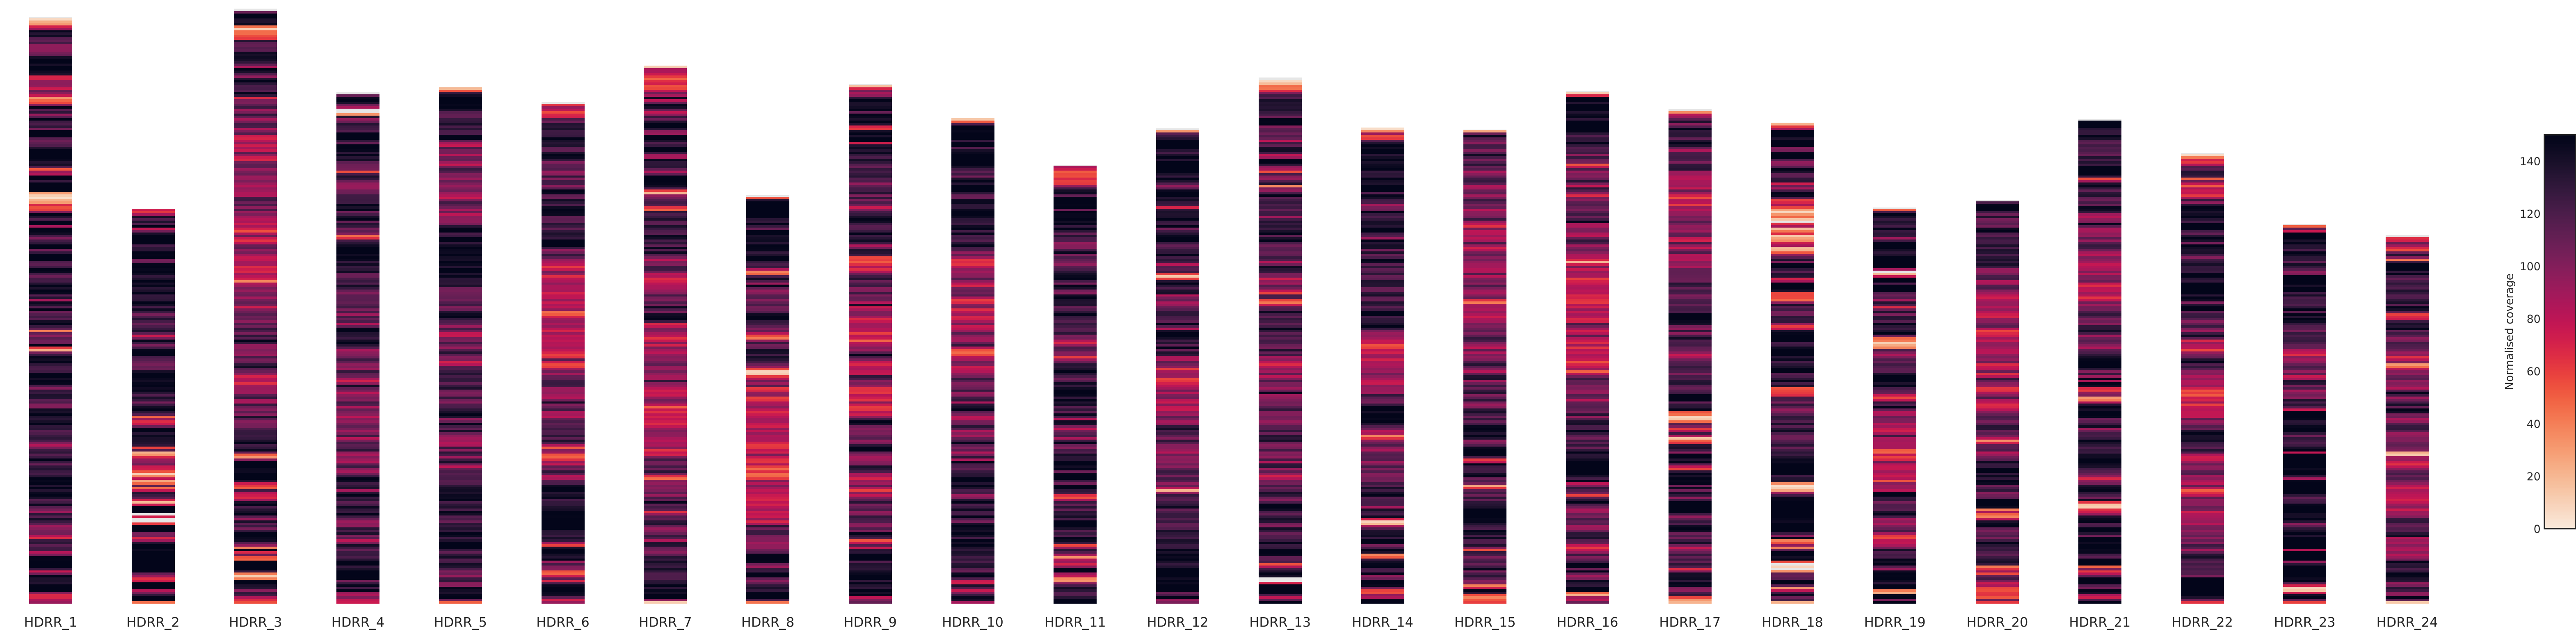

Karyotype of normalised coverage for reference HDRR with line 79-2

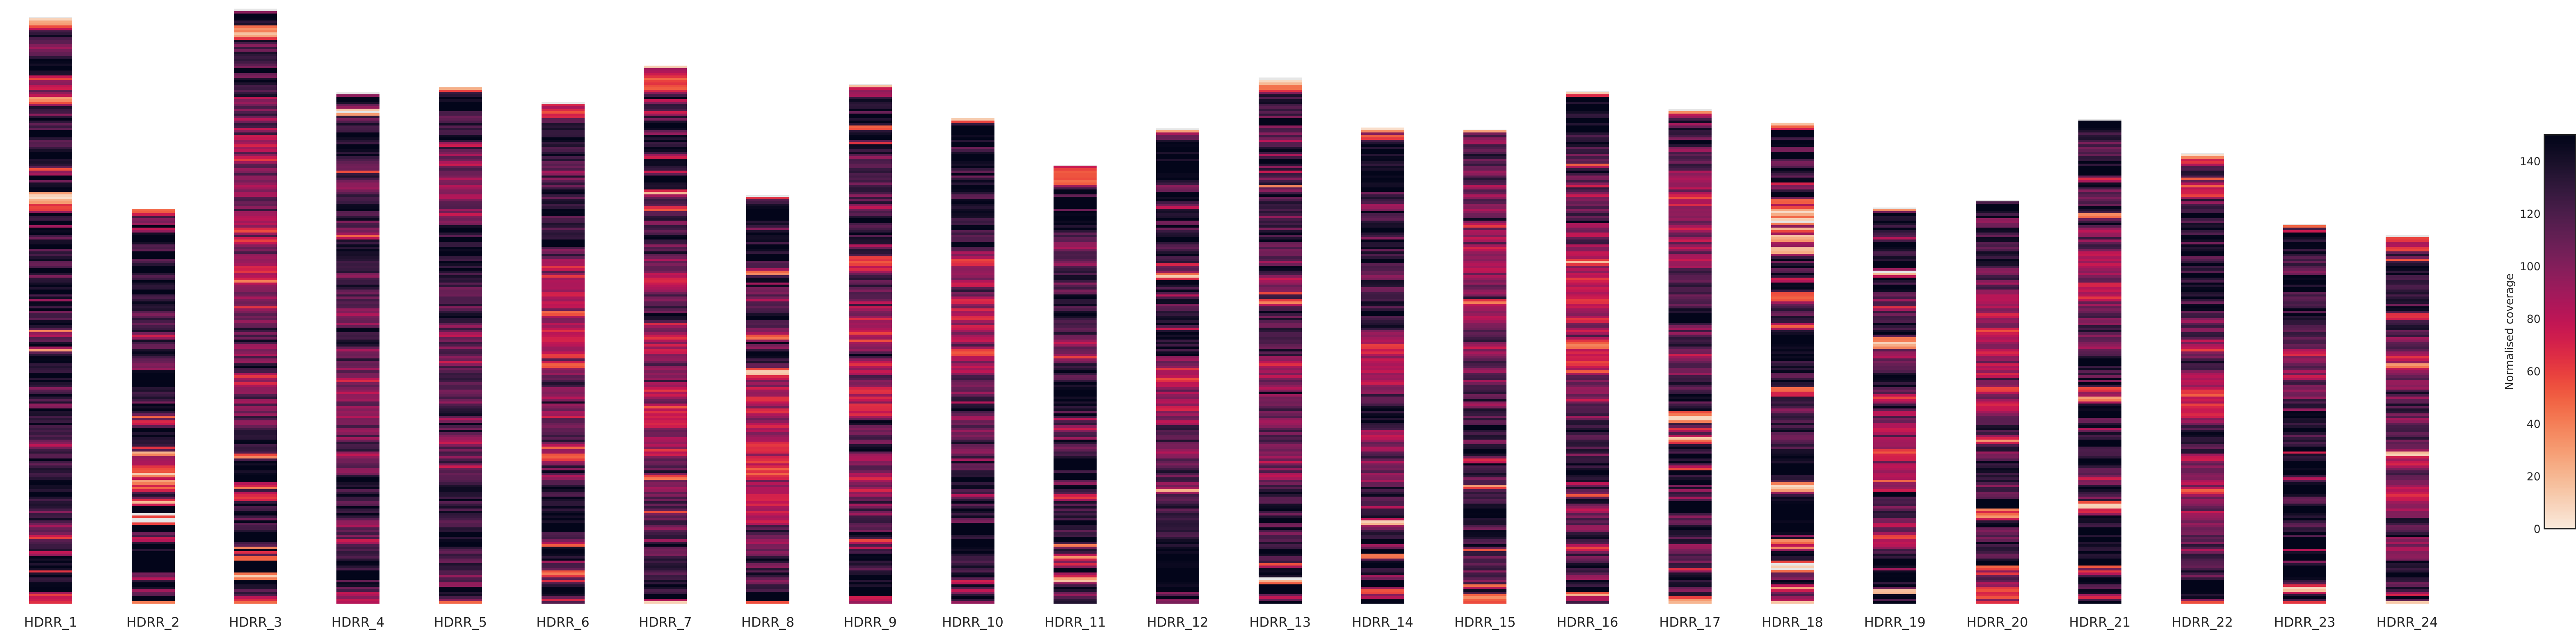

Karyotype of normalised coverage for reference HDRR with line 80-1

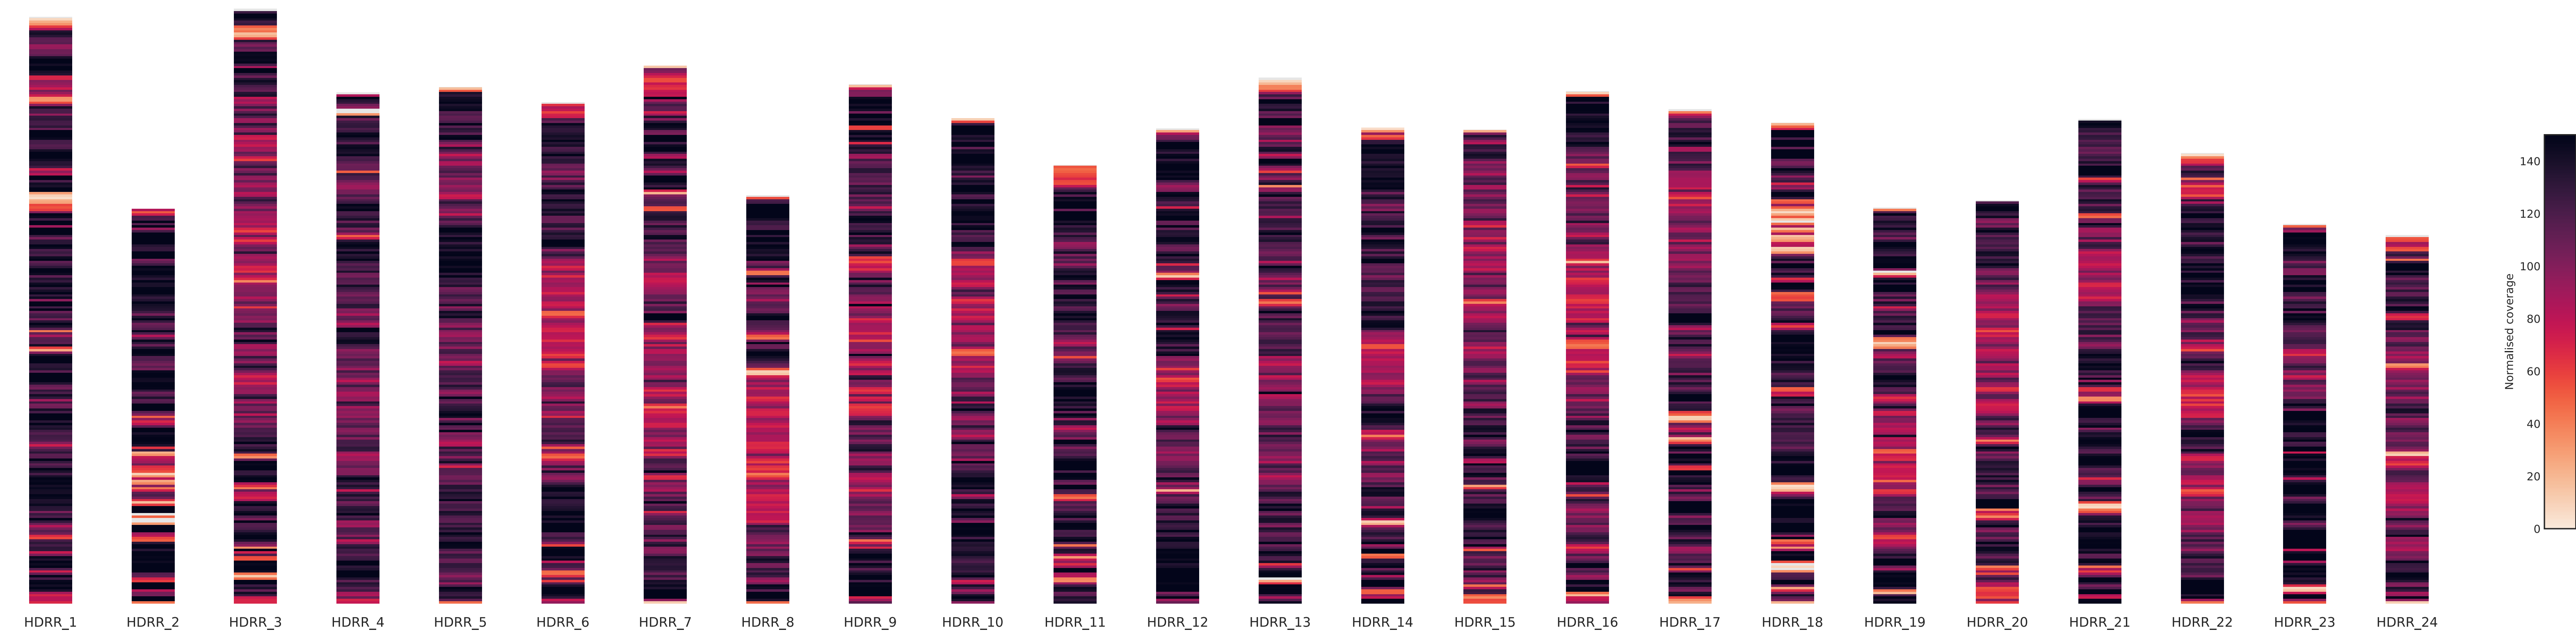



Karyotype of normalised coverage for reference HDRR with line 117-2

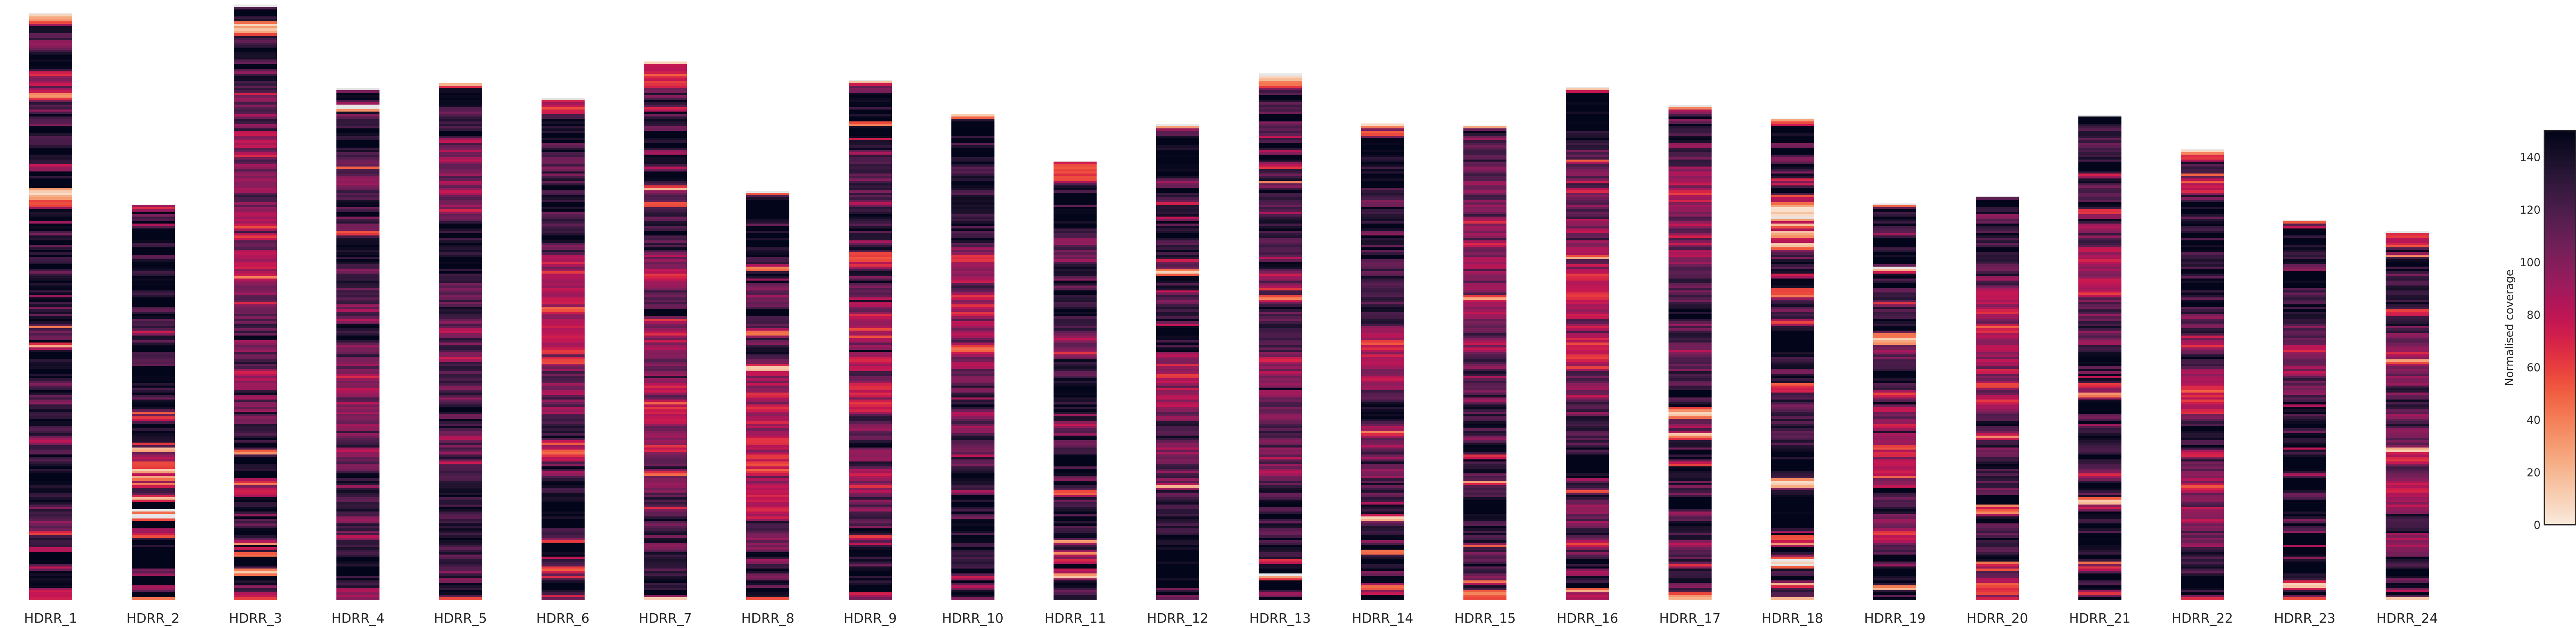

Karyotype of normalised coverage for reference HDRR with line 131-1

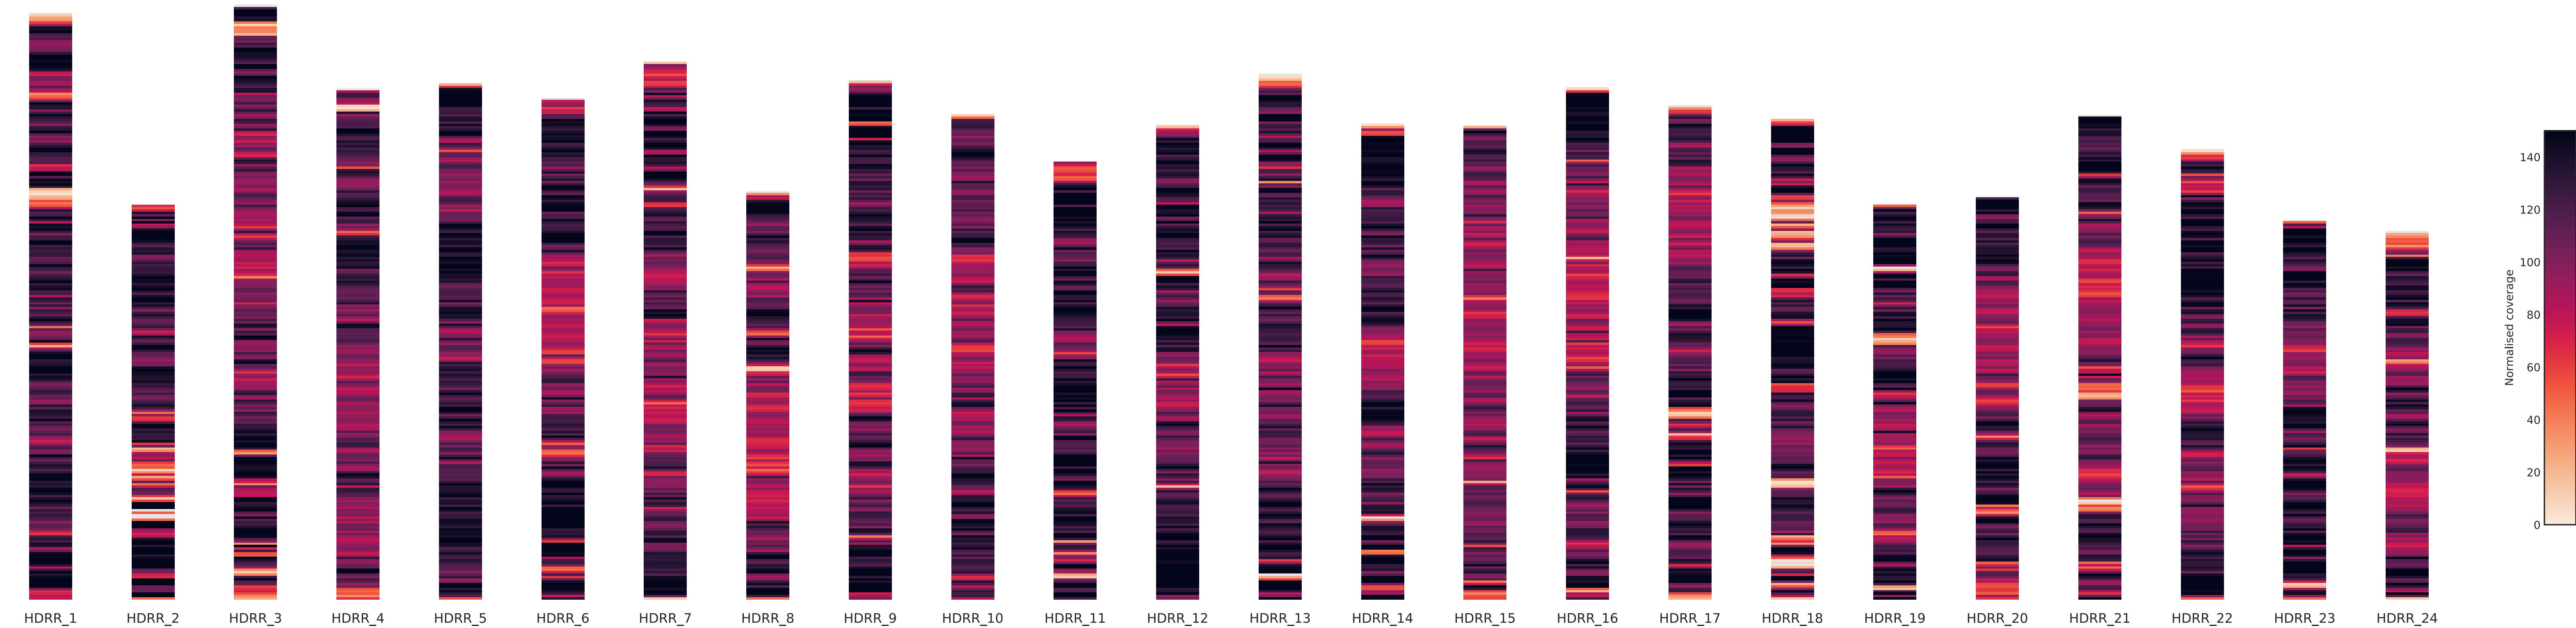

Karyotype of normalised coverage for reference HDRR with line 134-1

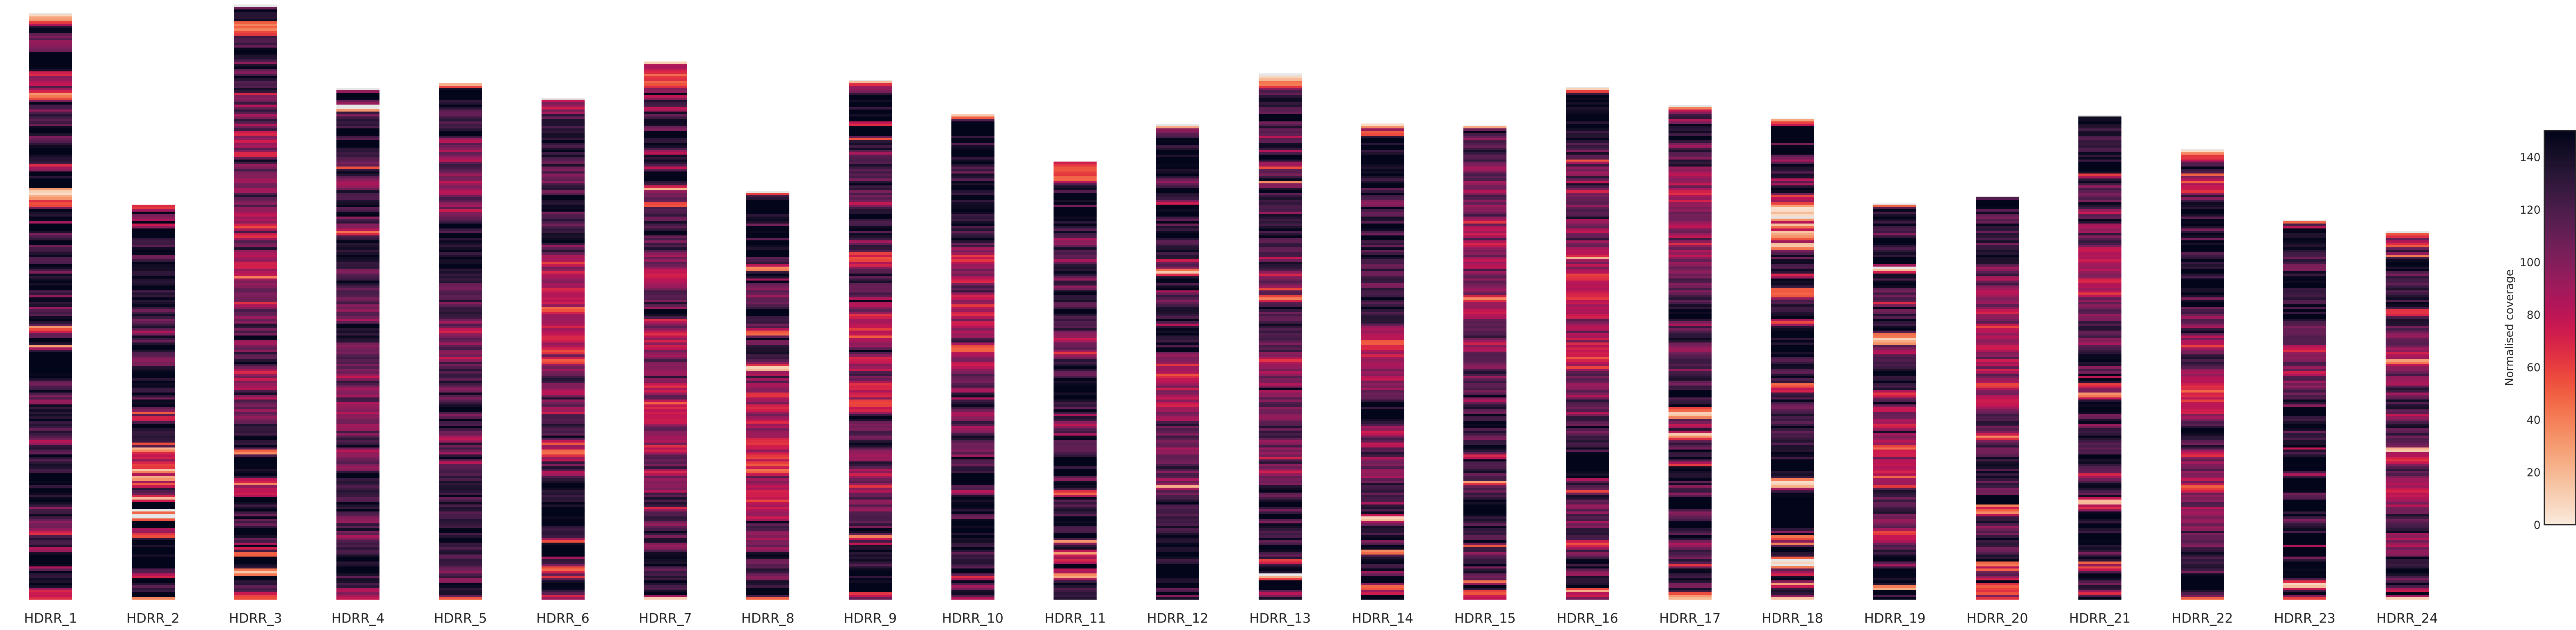

Karyotype of normalised coverage for reference HDRR with line 134-2

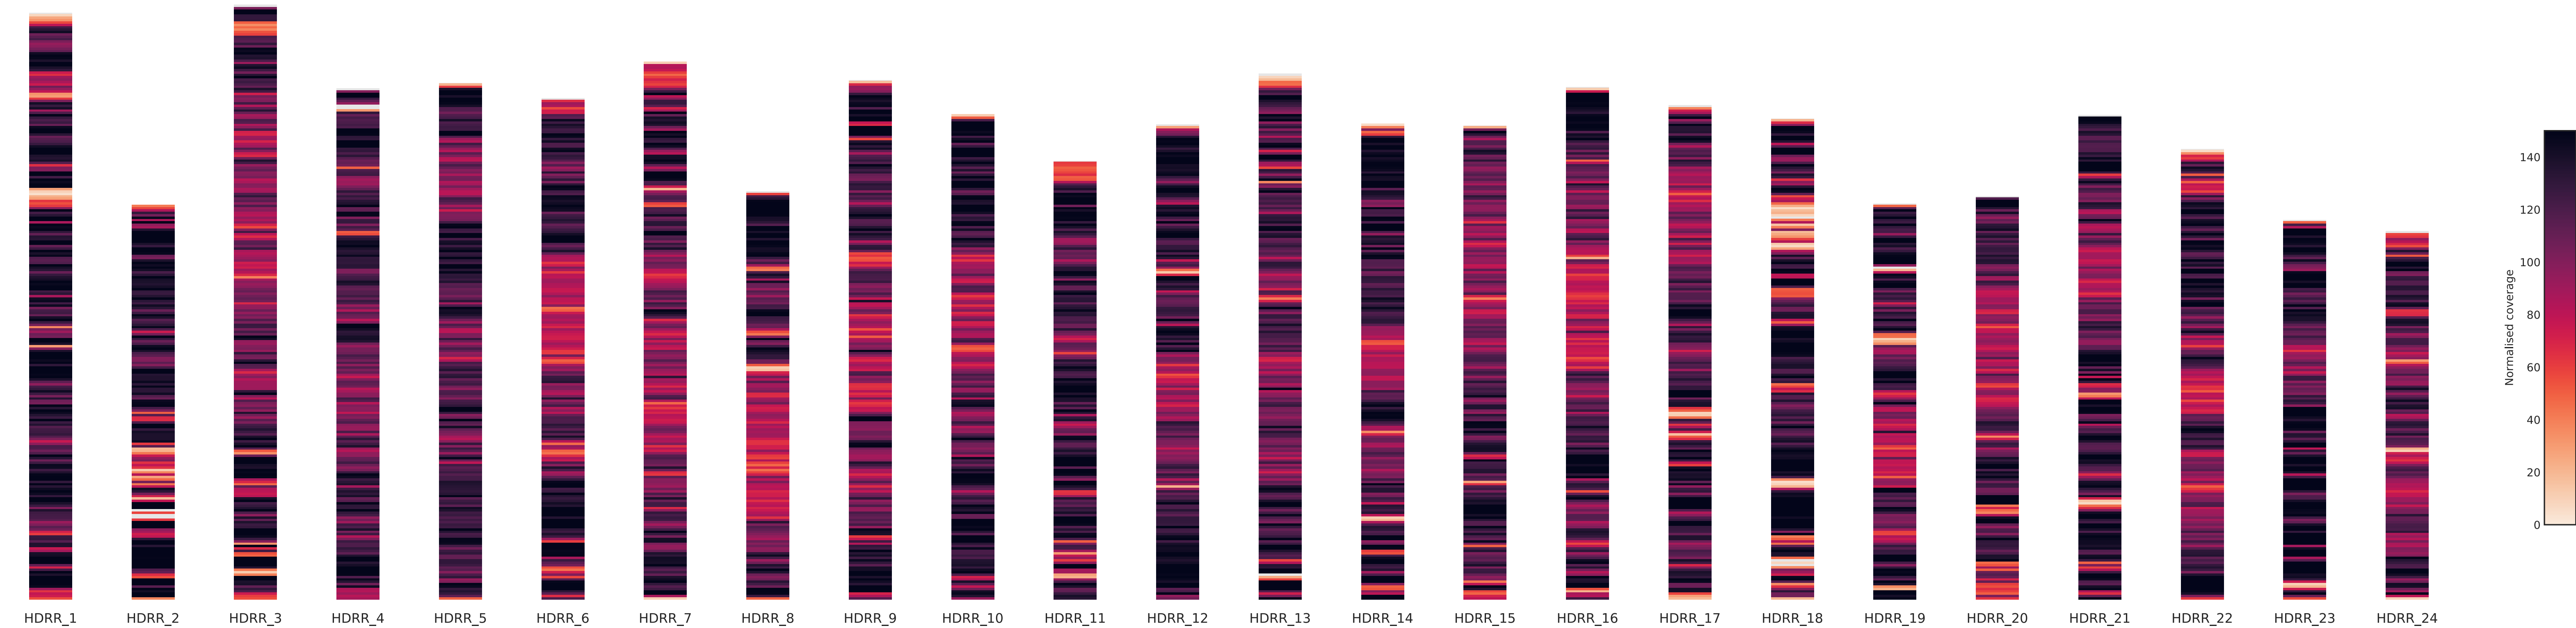

Karyotype of median normalised coverage for reference HDRR

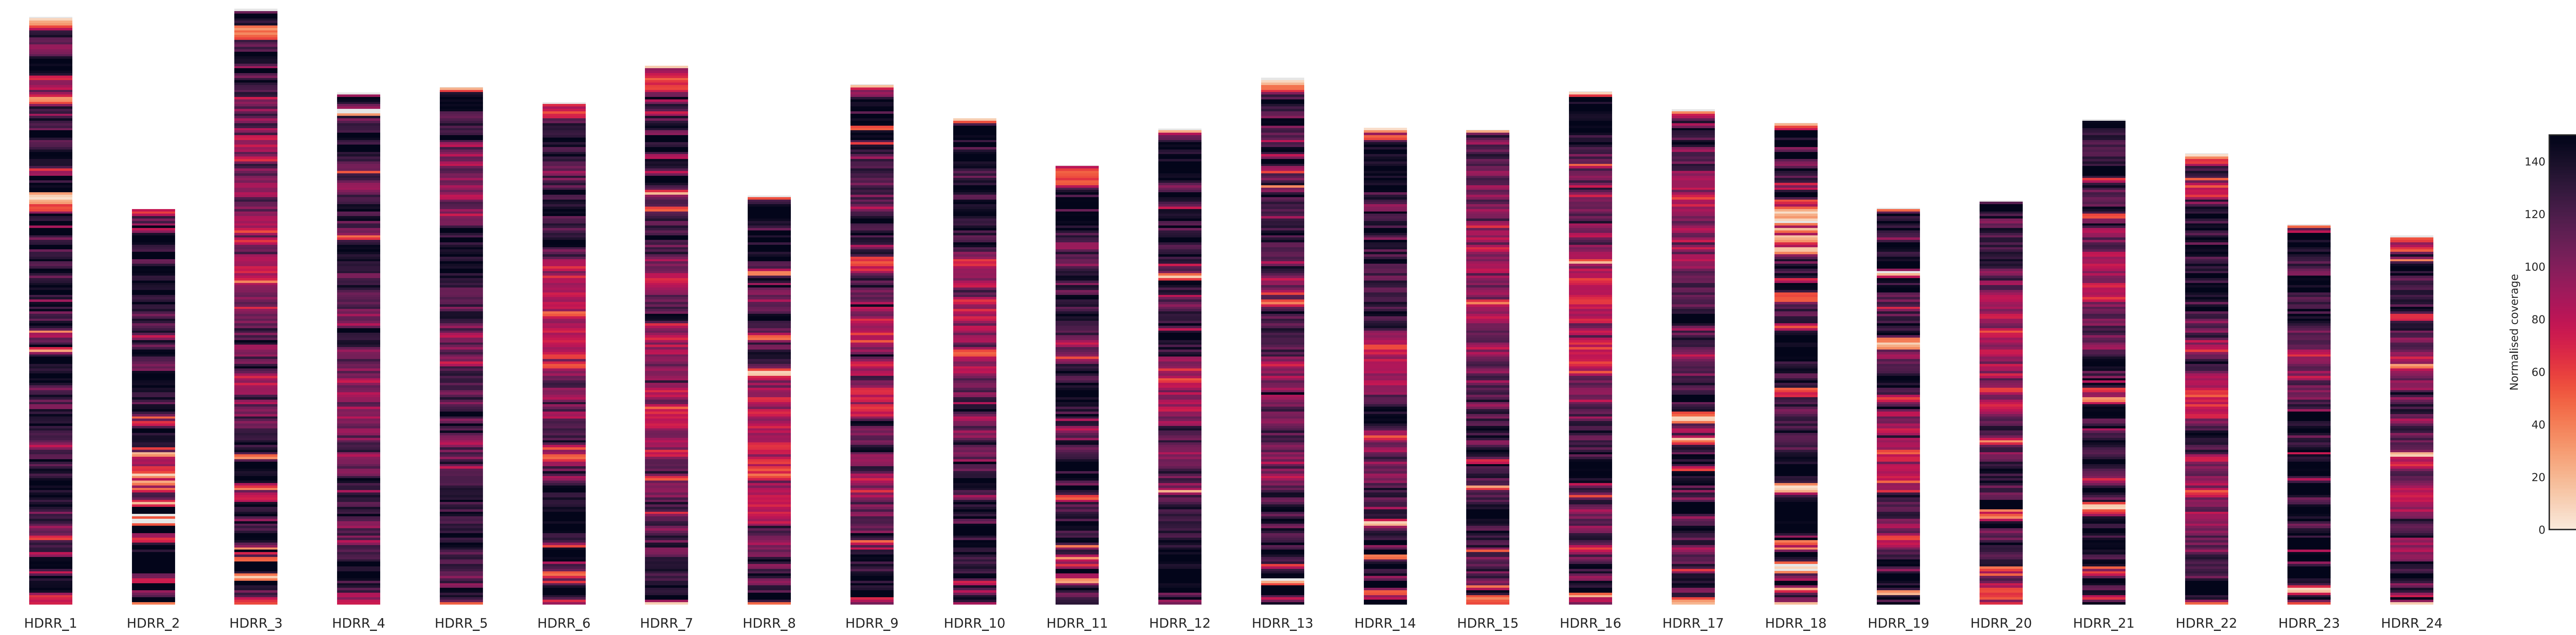

Karyotype of normalised coverage for reference HNI with line 4-1

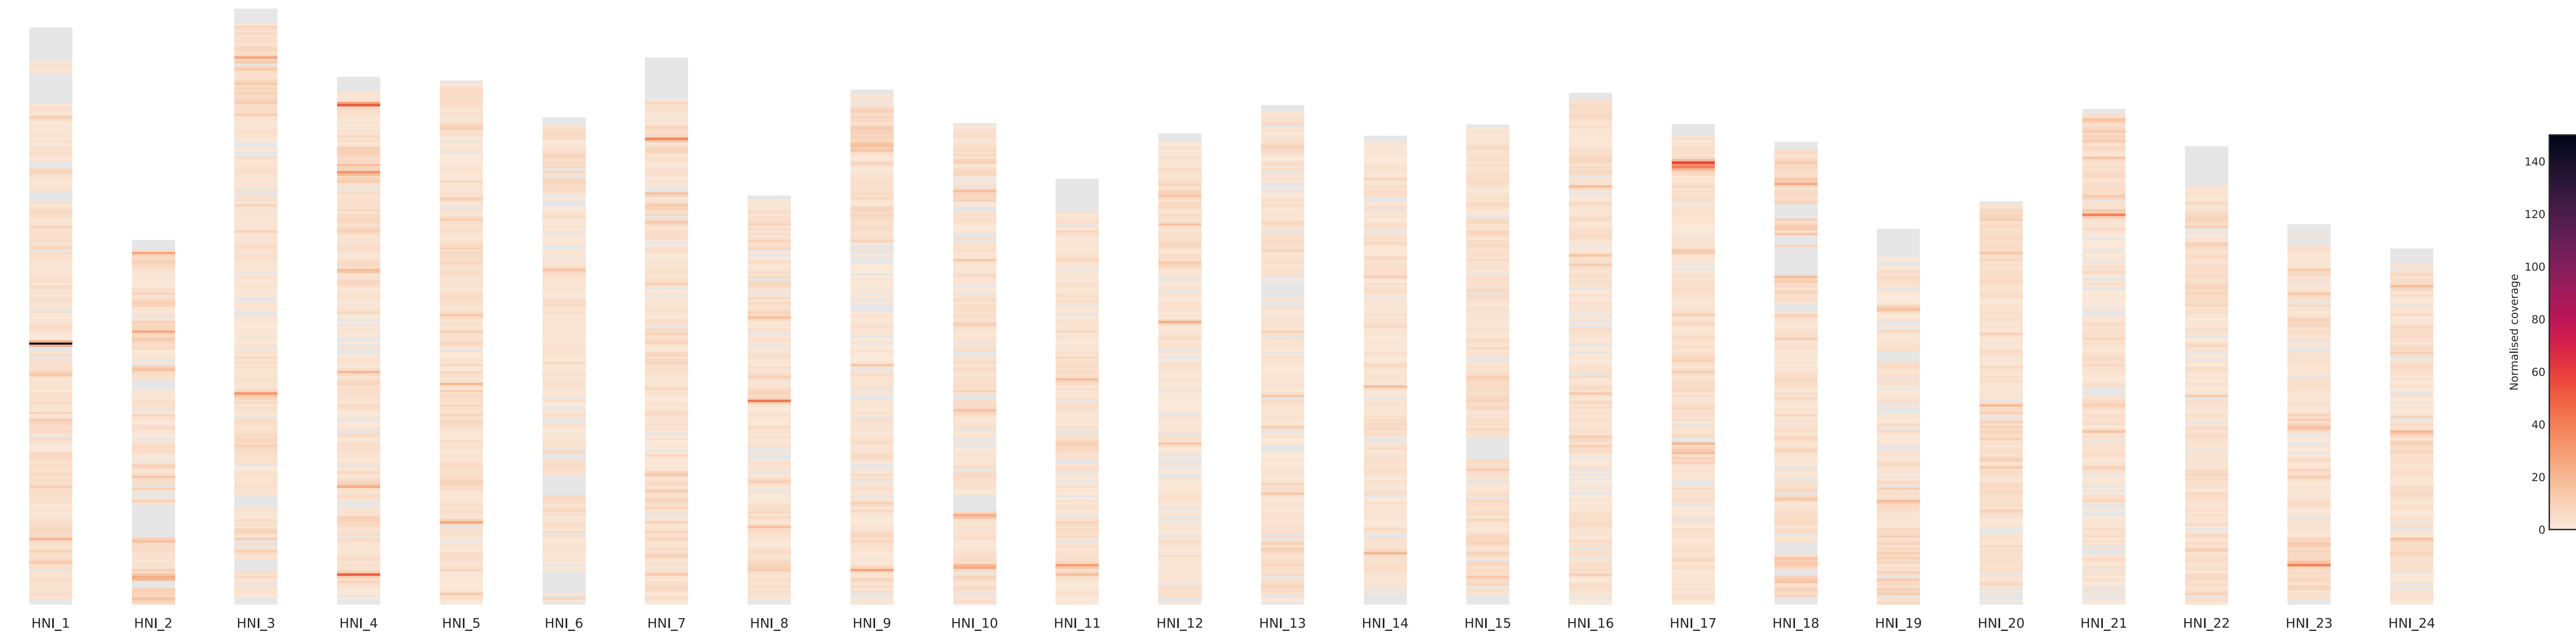

Karyotype of normalised coverage for reference HNI with line 4-2

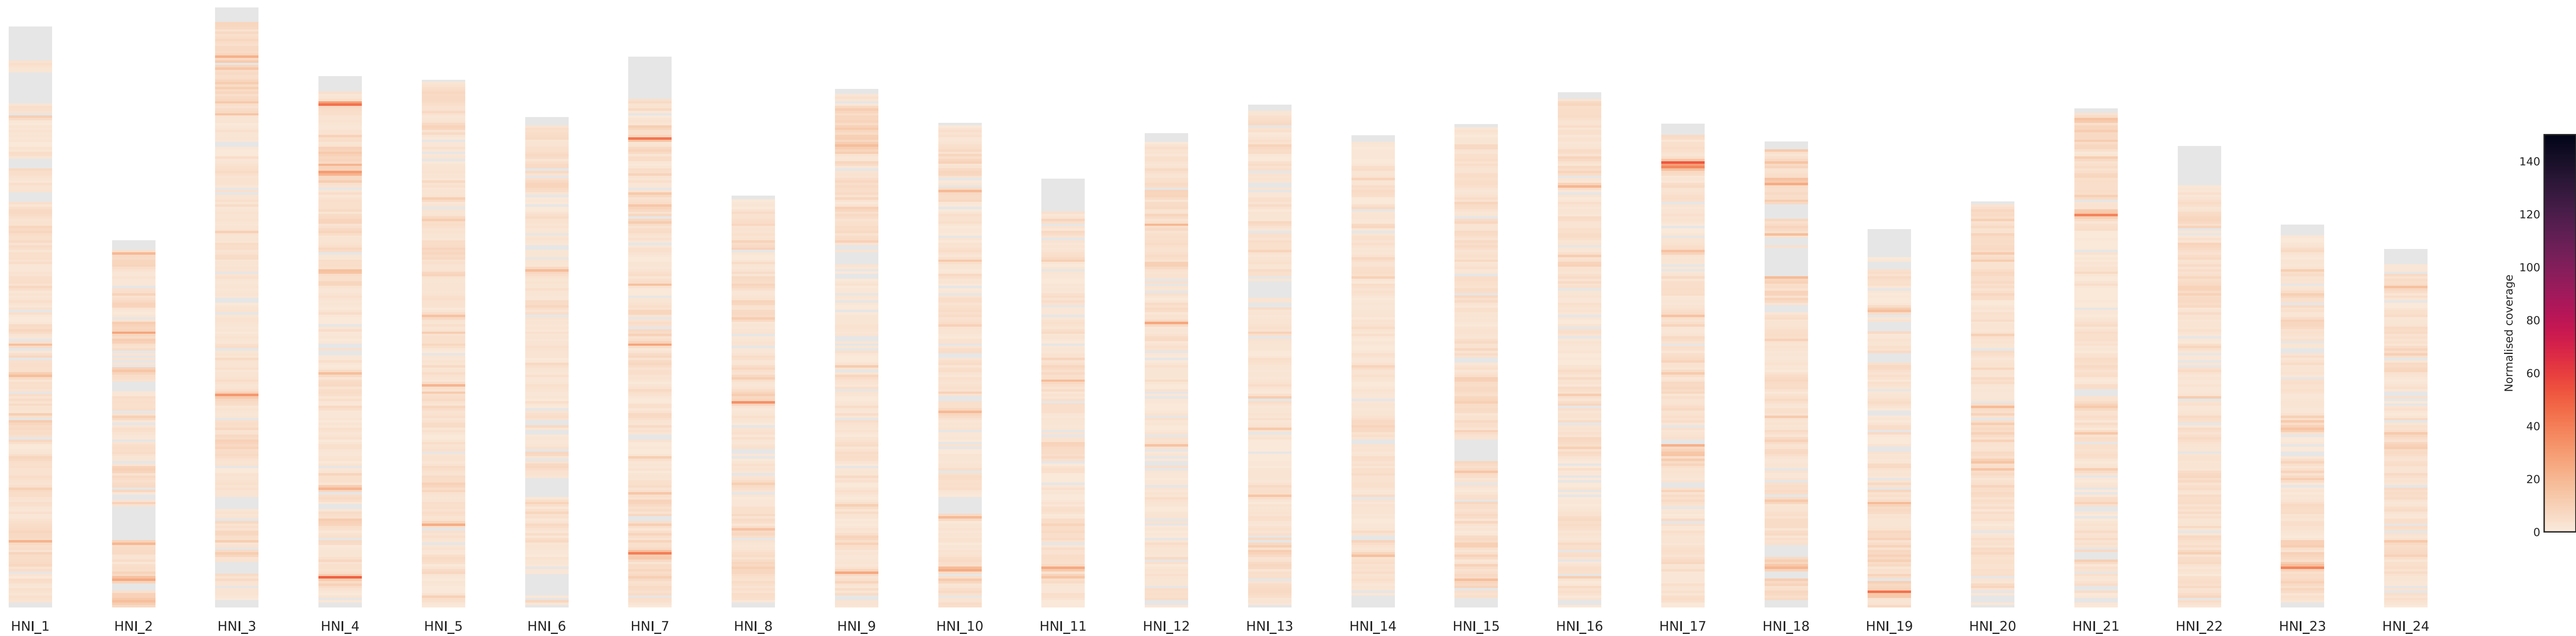

Karyotype of normalised coverage for reference HNI with line 7-1

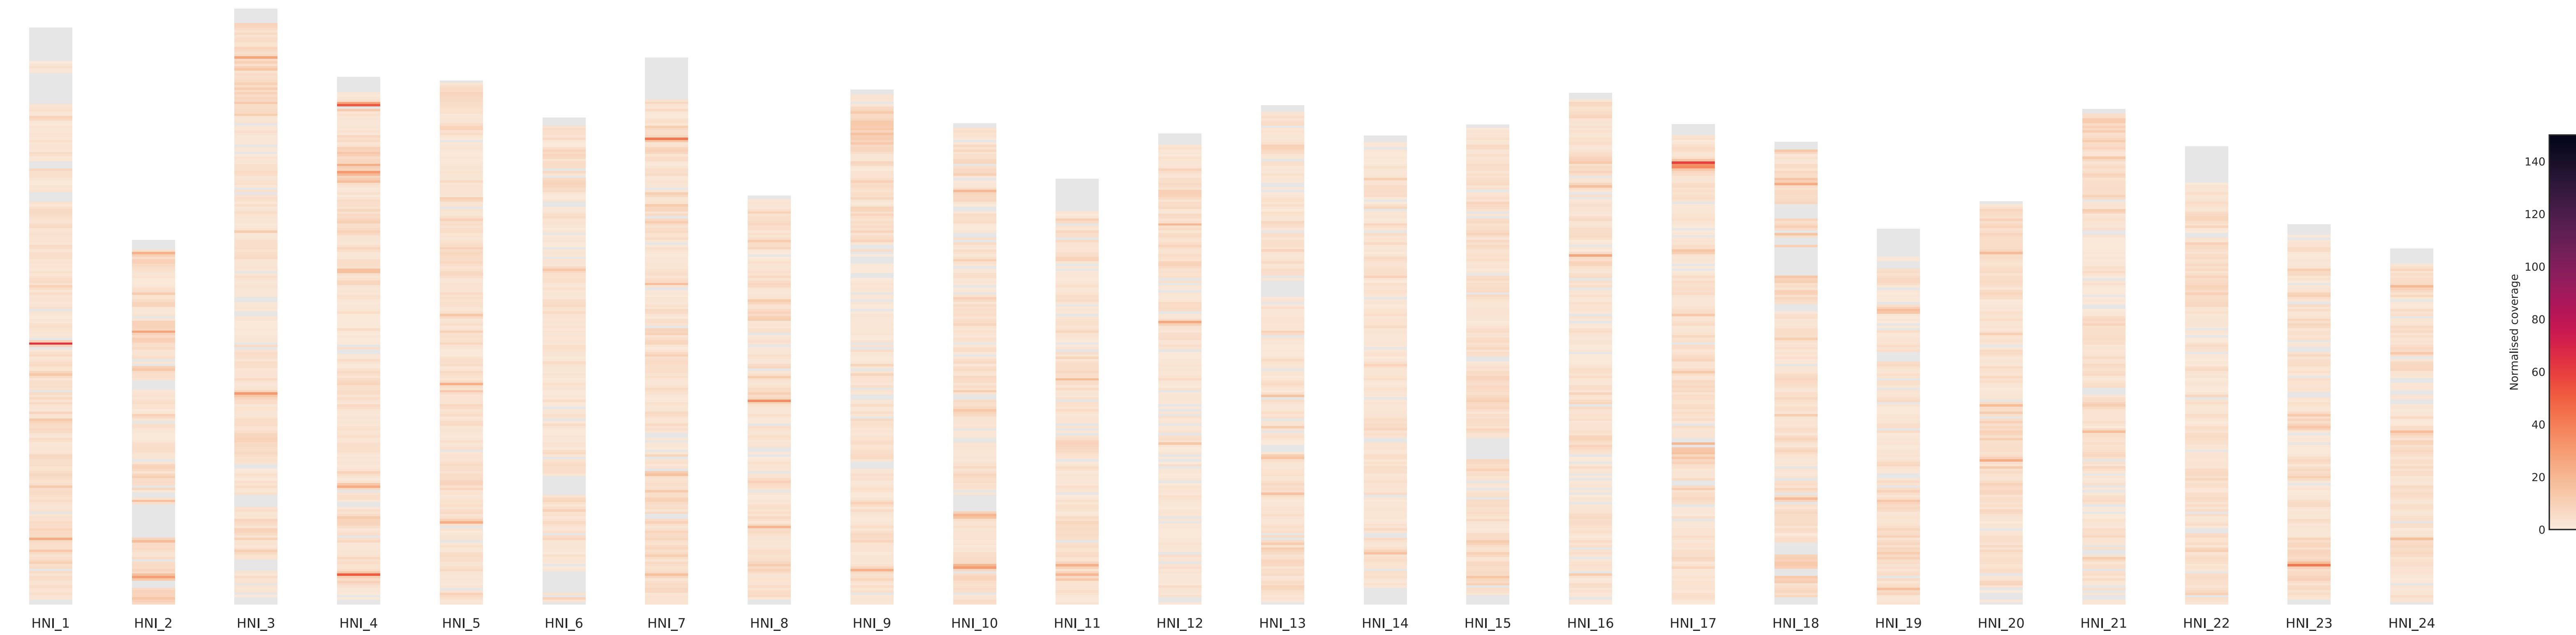



Karyotype of normalised coverage for reference HNI with line 7-2

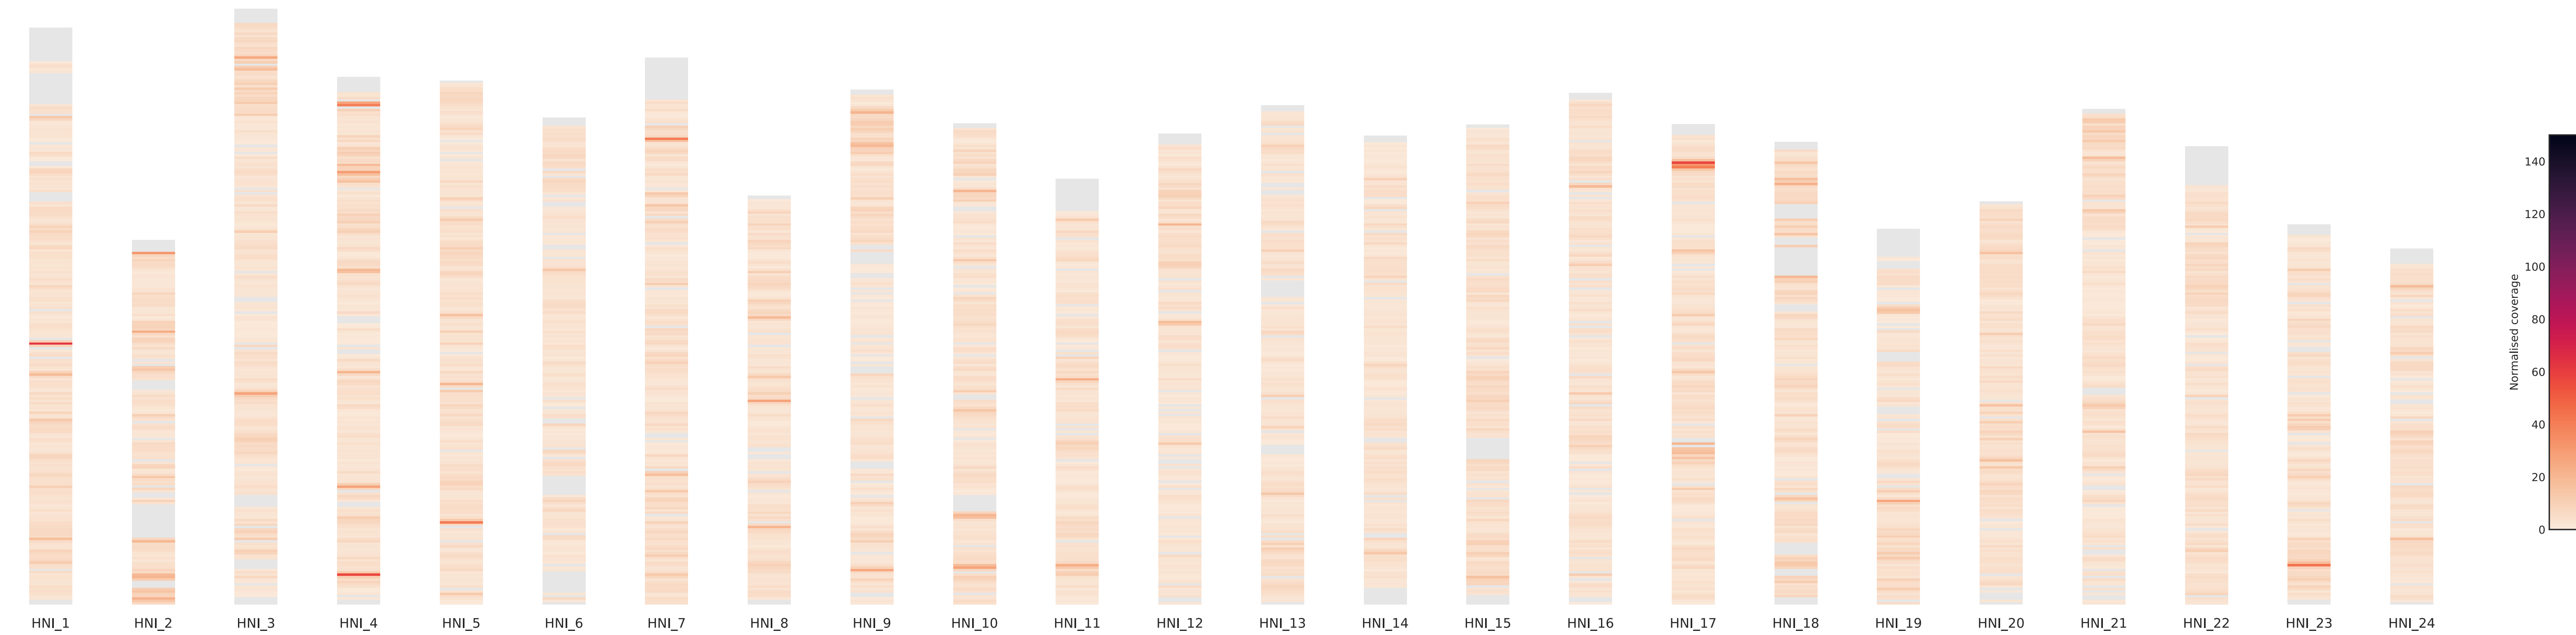

Karyotype of normalised coverage for reference HNI with line 11-1

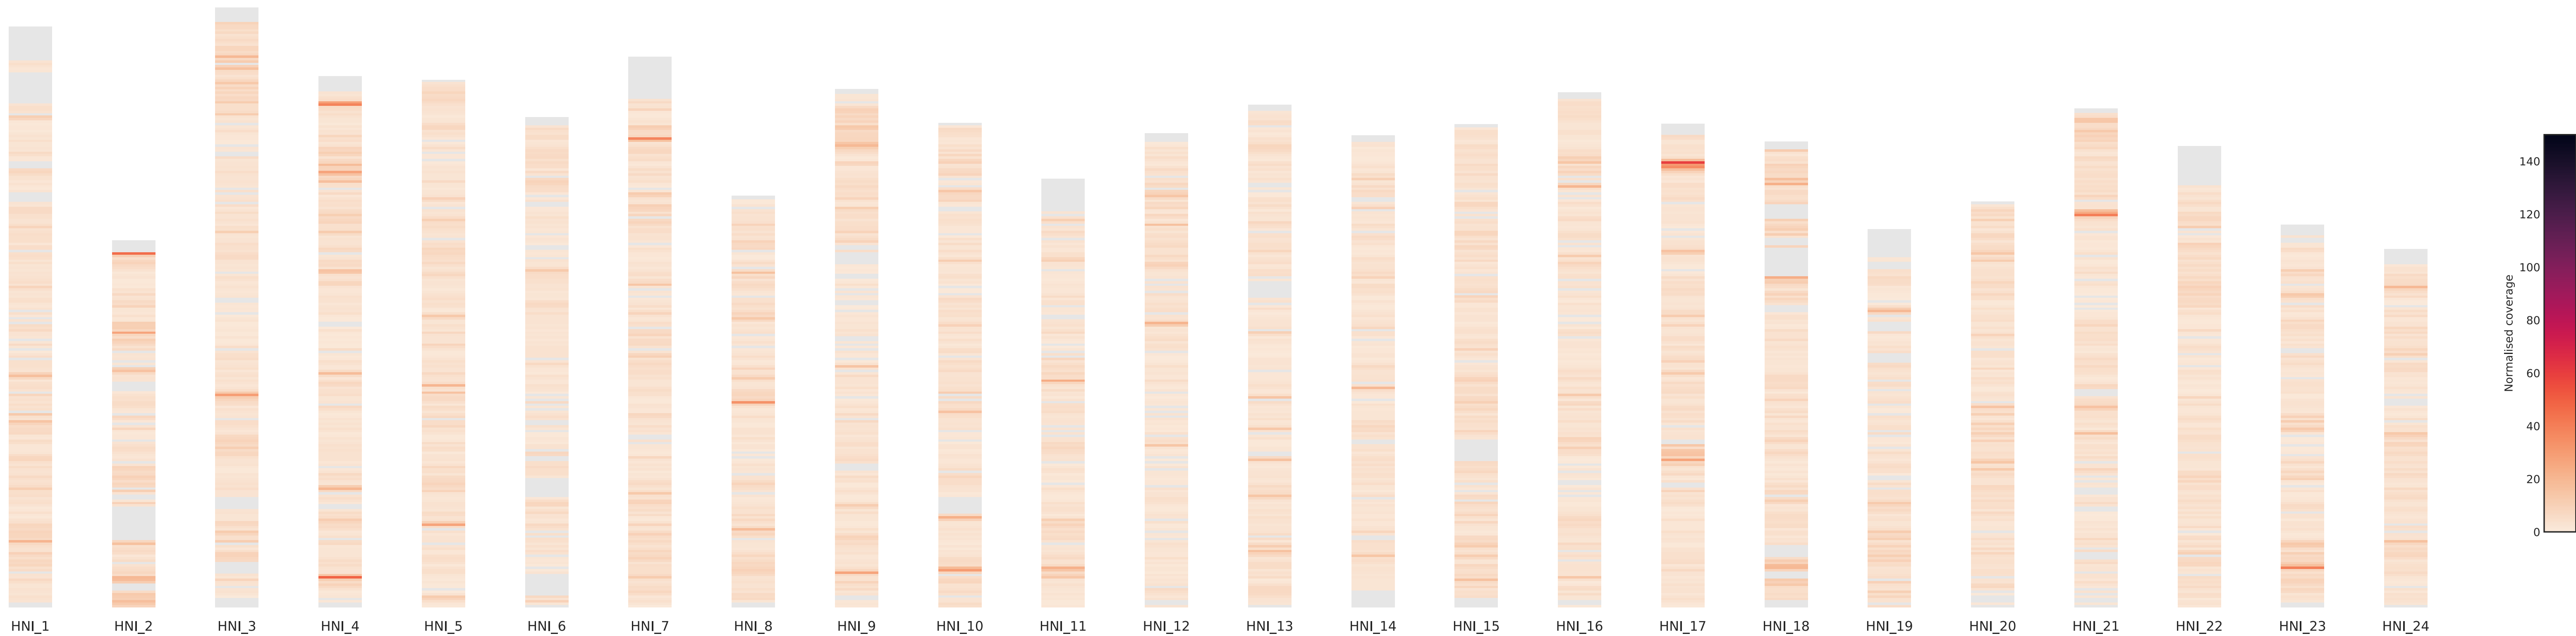

Karyotype of normalised coverage for reference HNI with line 69-1

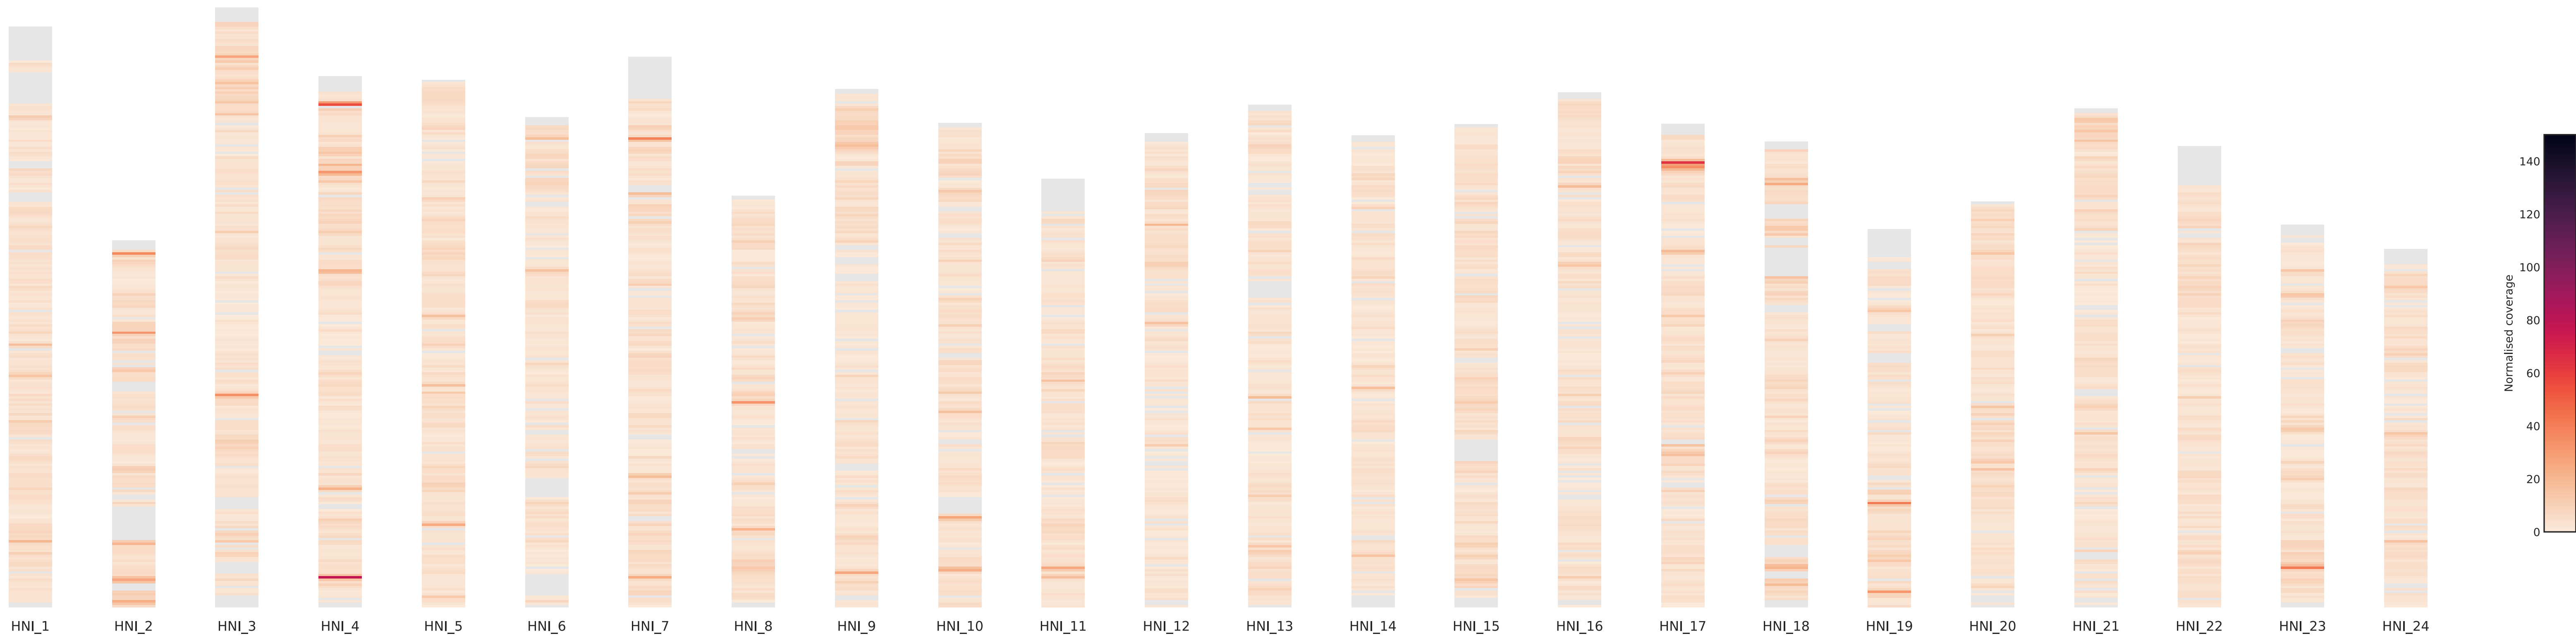

Karyotype of normalised coverage for reference HNI with line 79-2

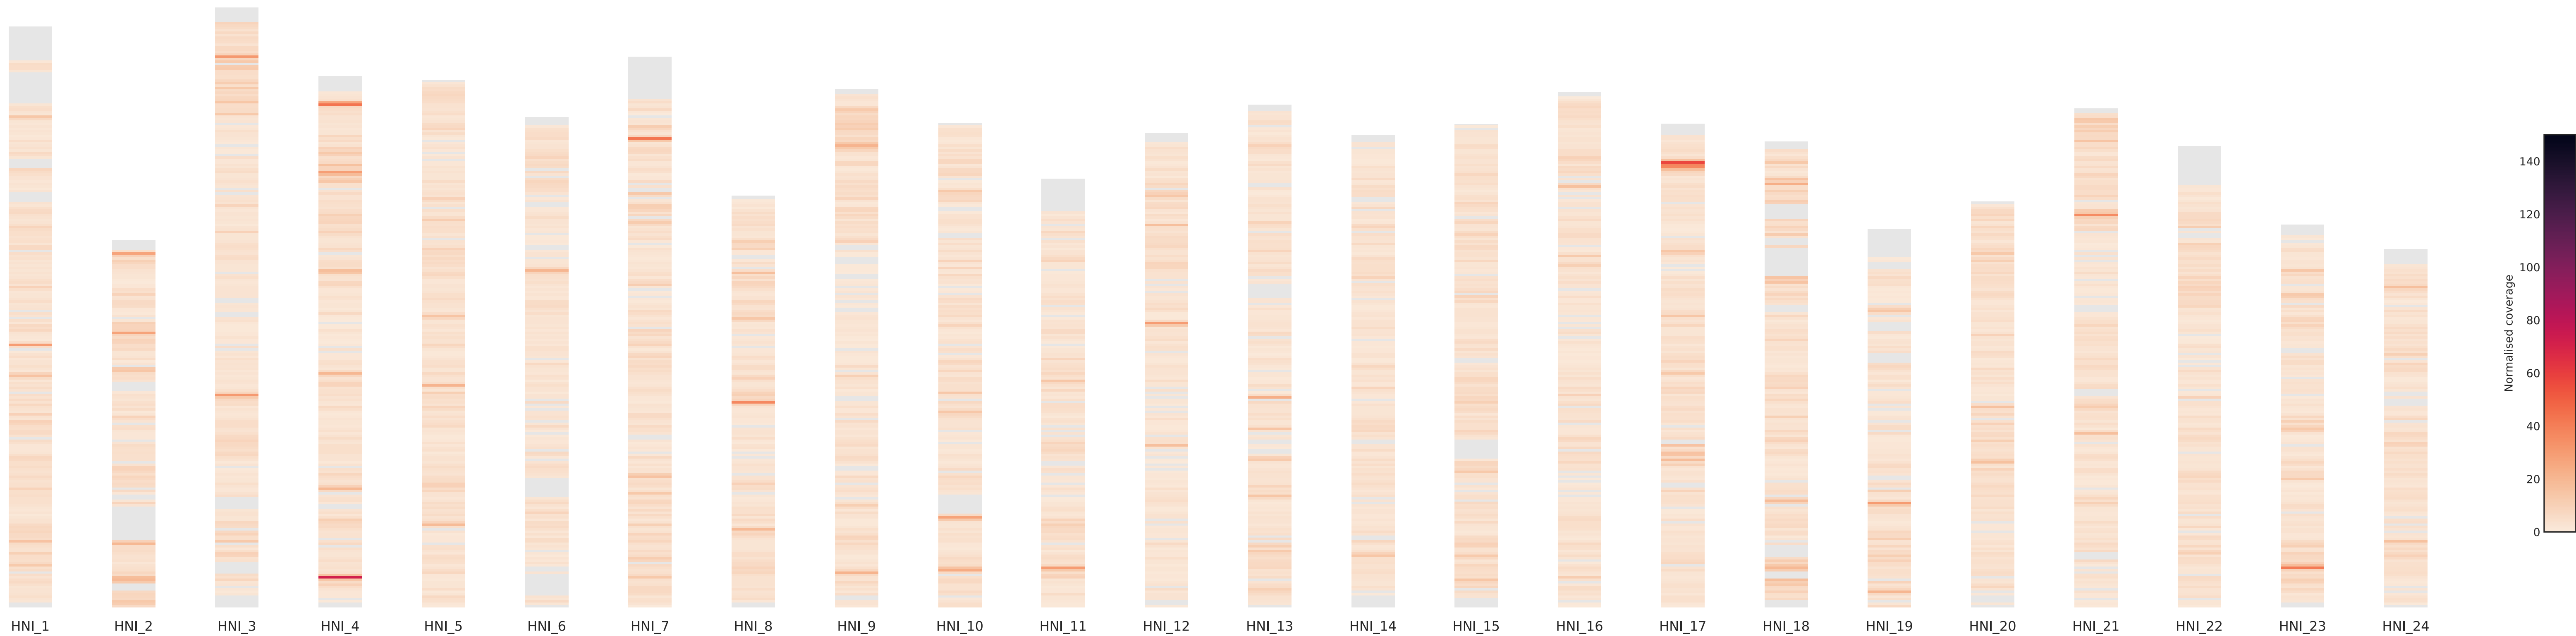

Karyotype of normalised coverage for reference HNI with line 80-1

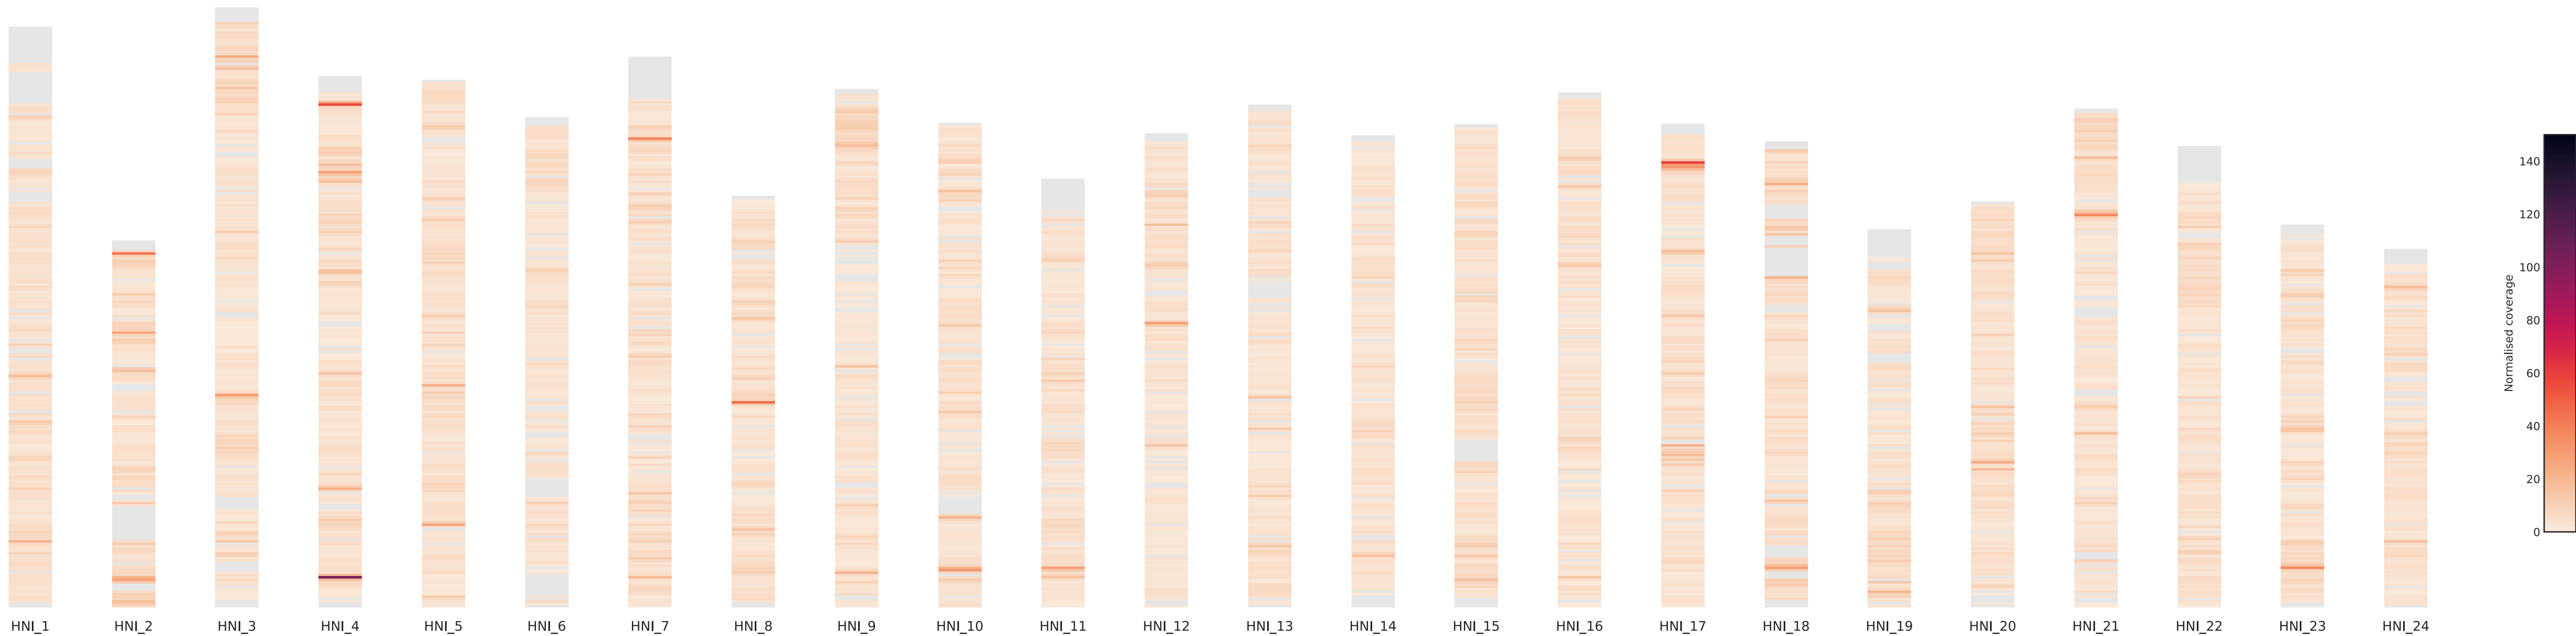

Karyotype of normalised coverage for reference HNI with line 117-2

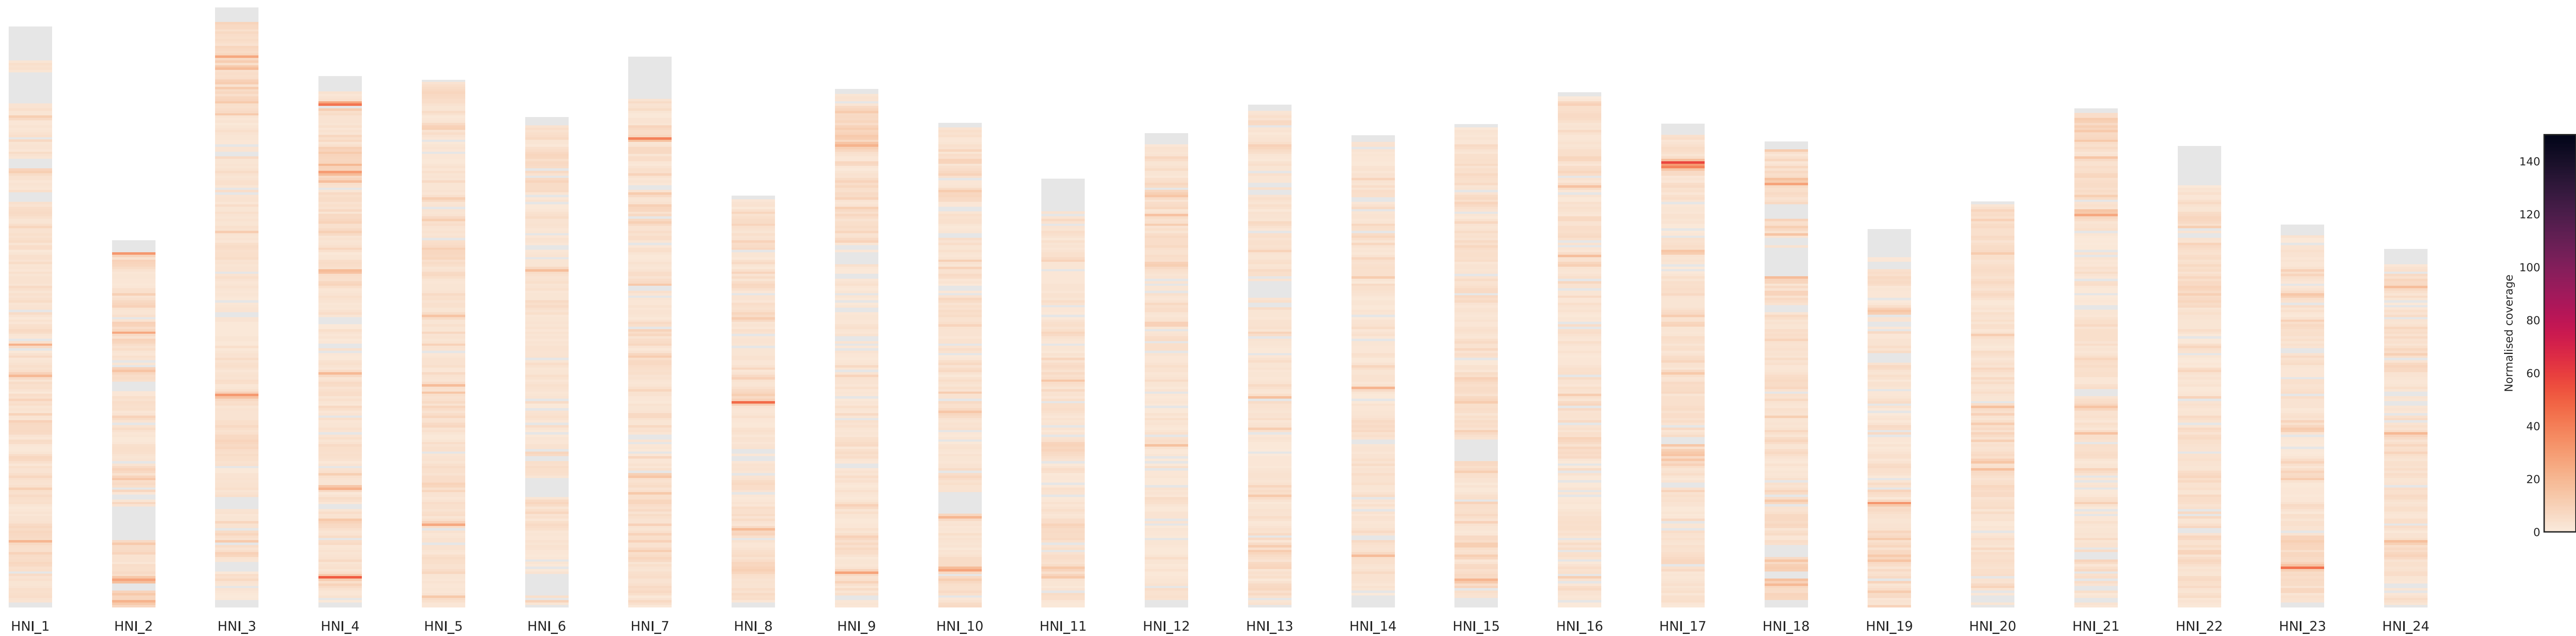

Karyotype of normalised coverage for reference HNI with line 131-1

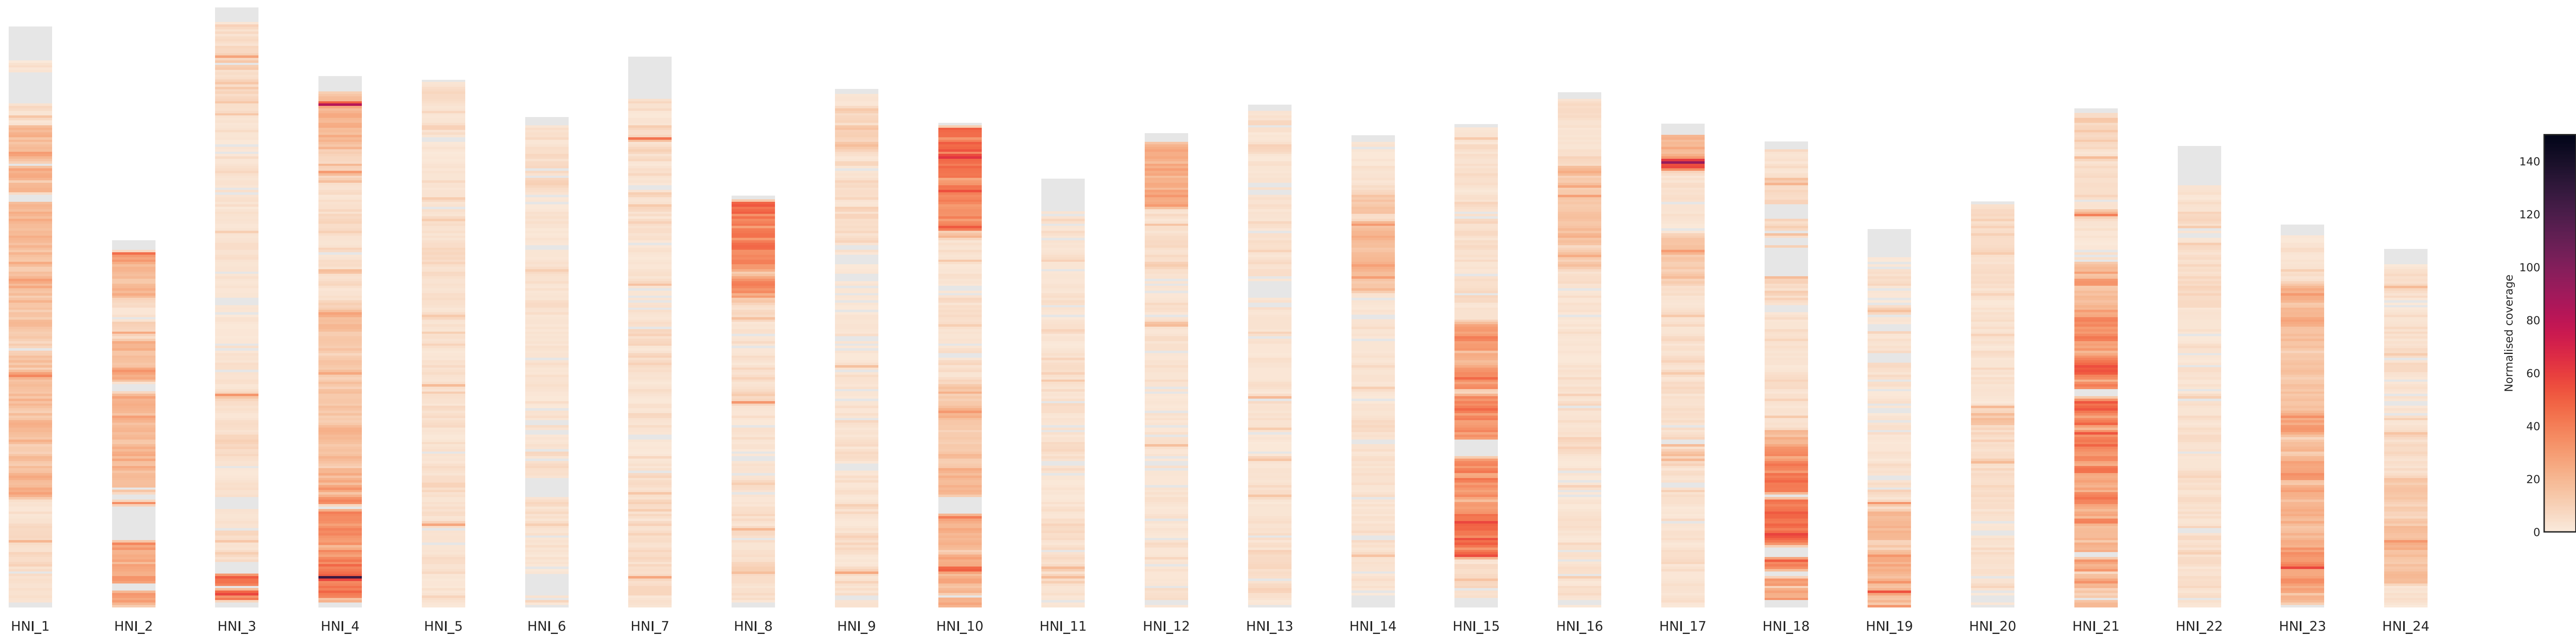

Karyotype of normalised coverage for reference HNI with line 134-1

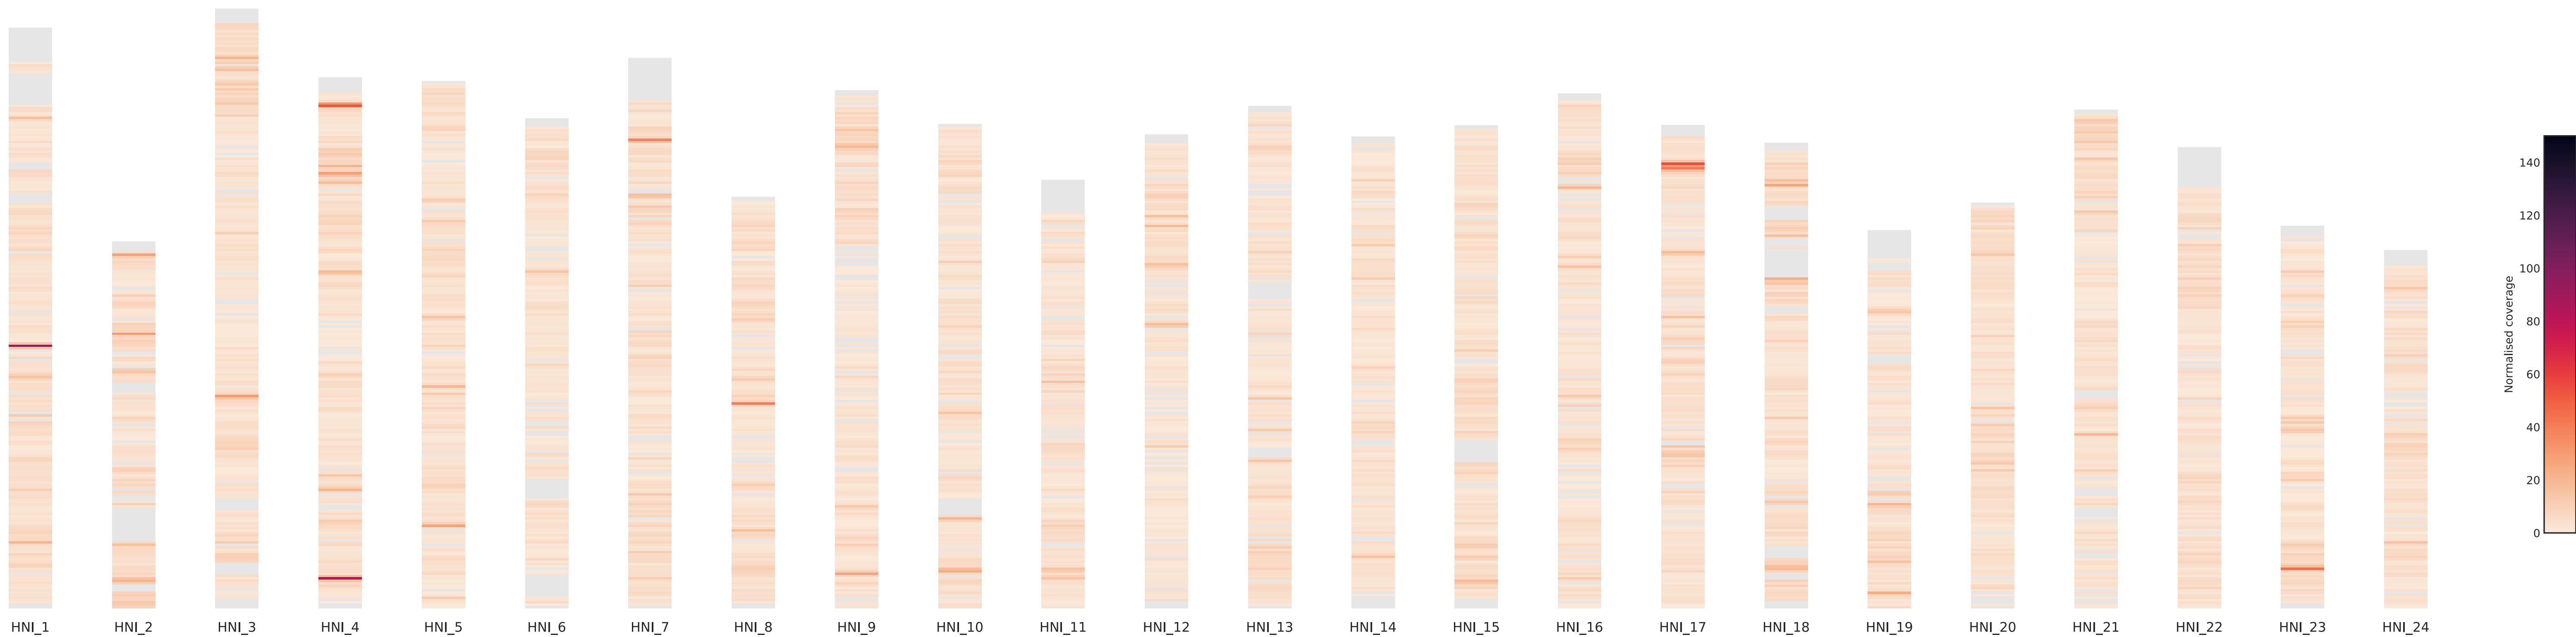



Karyotype of normalised coverage for reference HNI with line 134-2

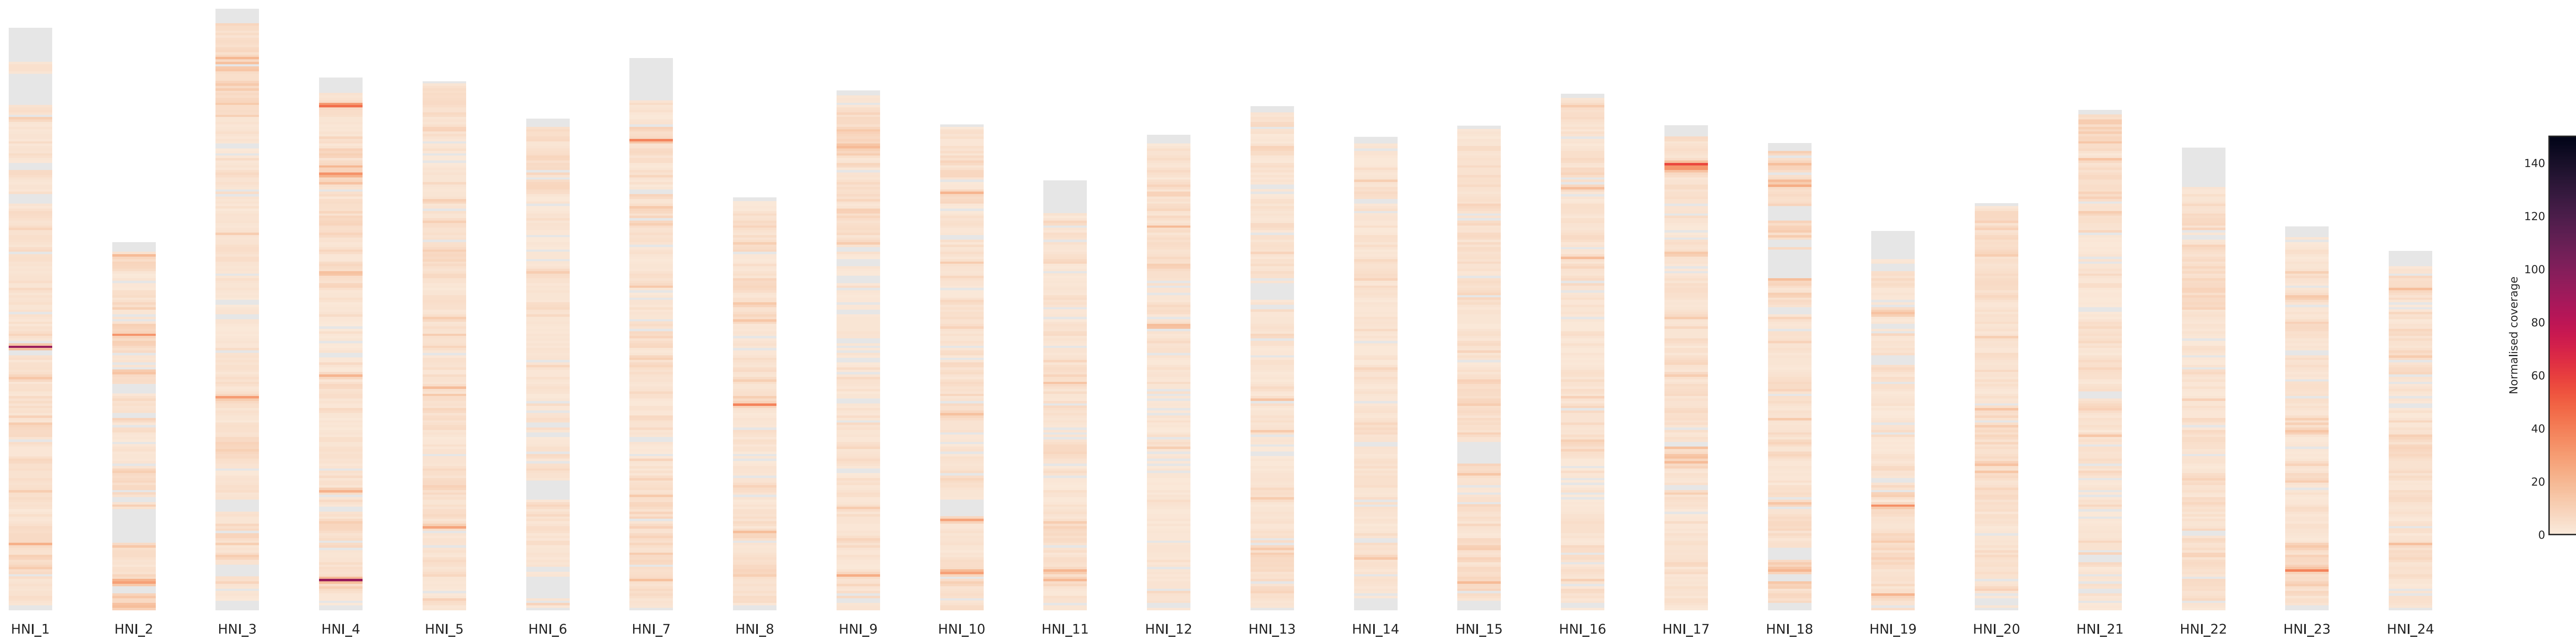

# Karyotype of median normalised coverage for reference HNI

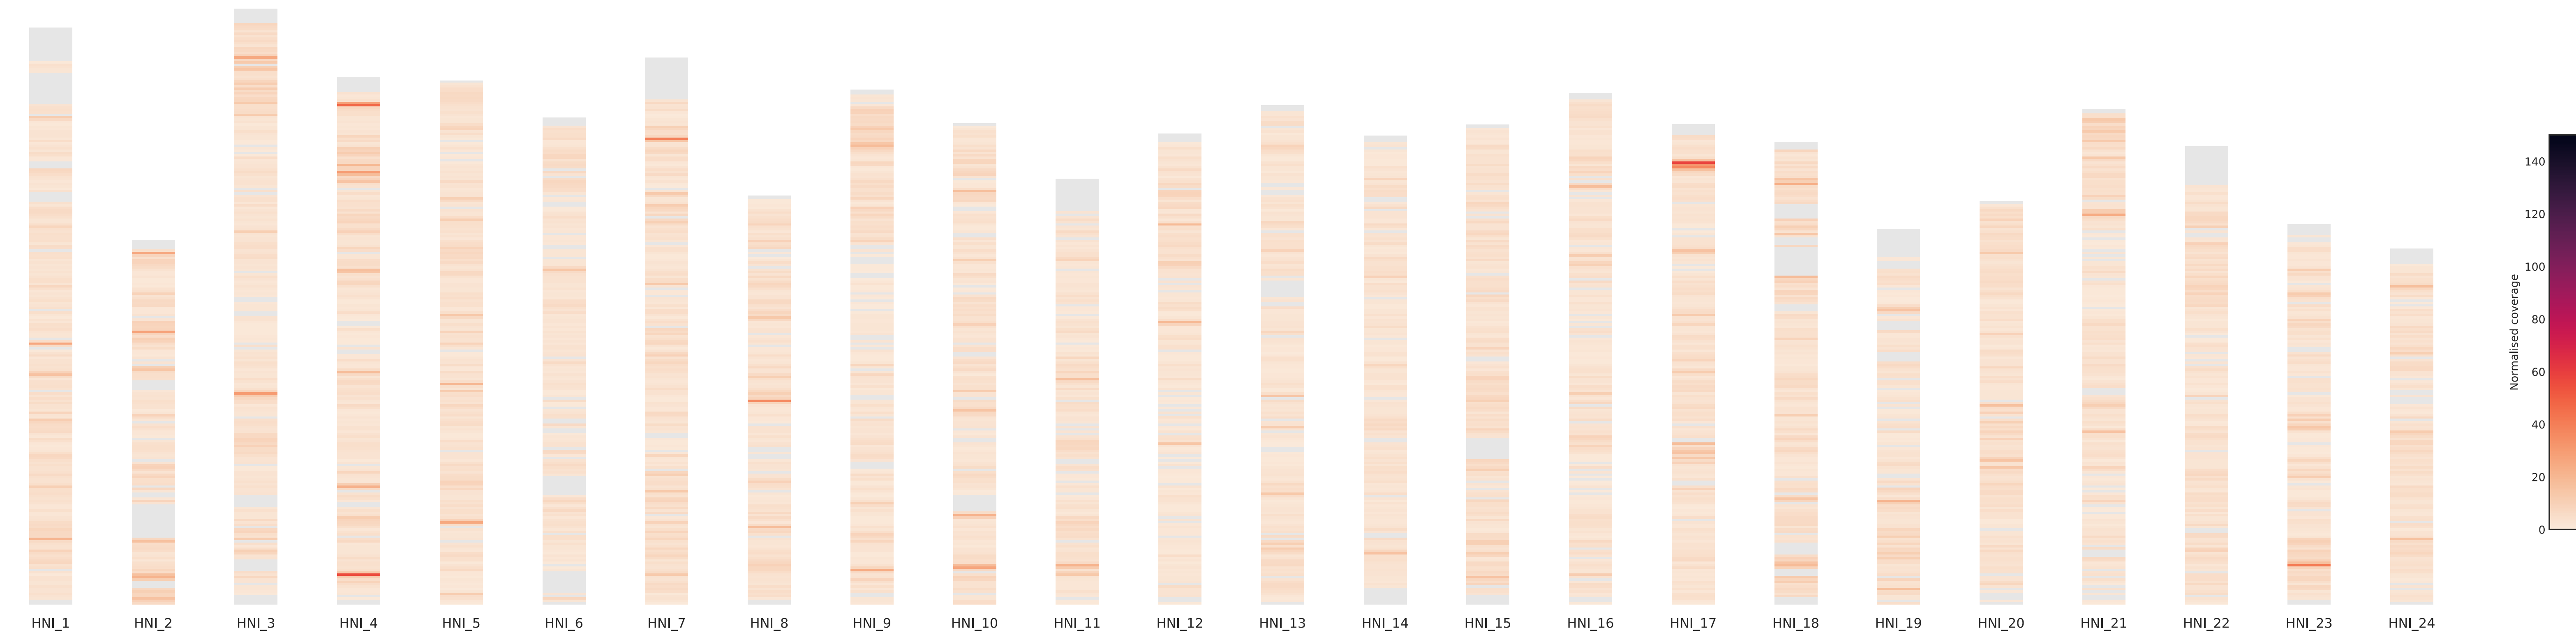

Karyotype of normalised coverage for reference HSOK with line 4-1

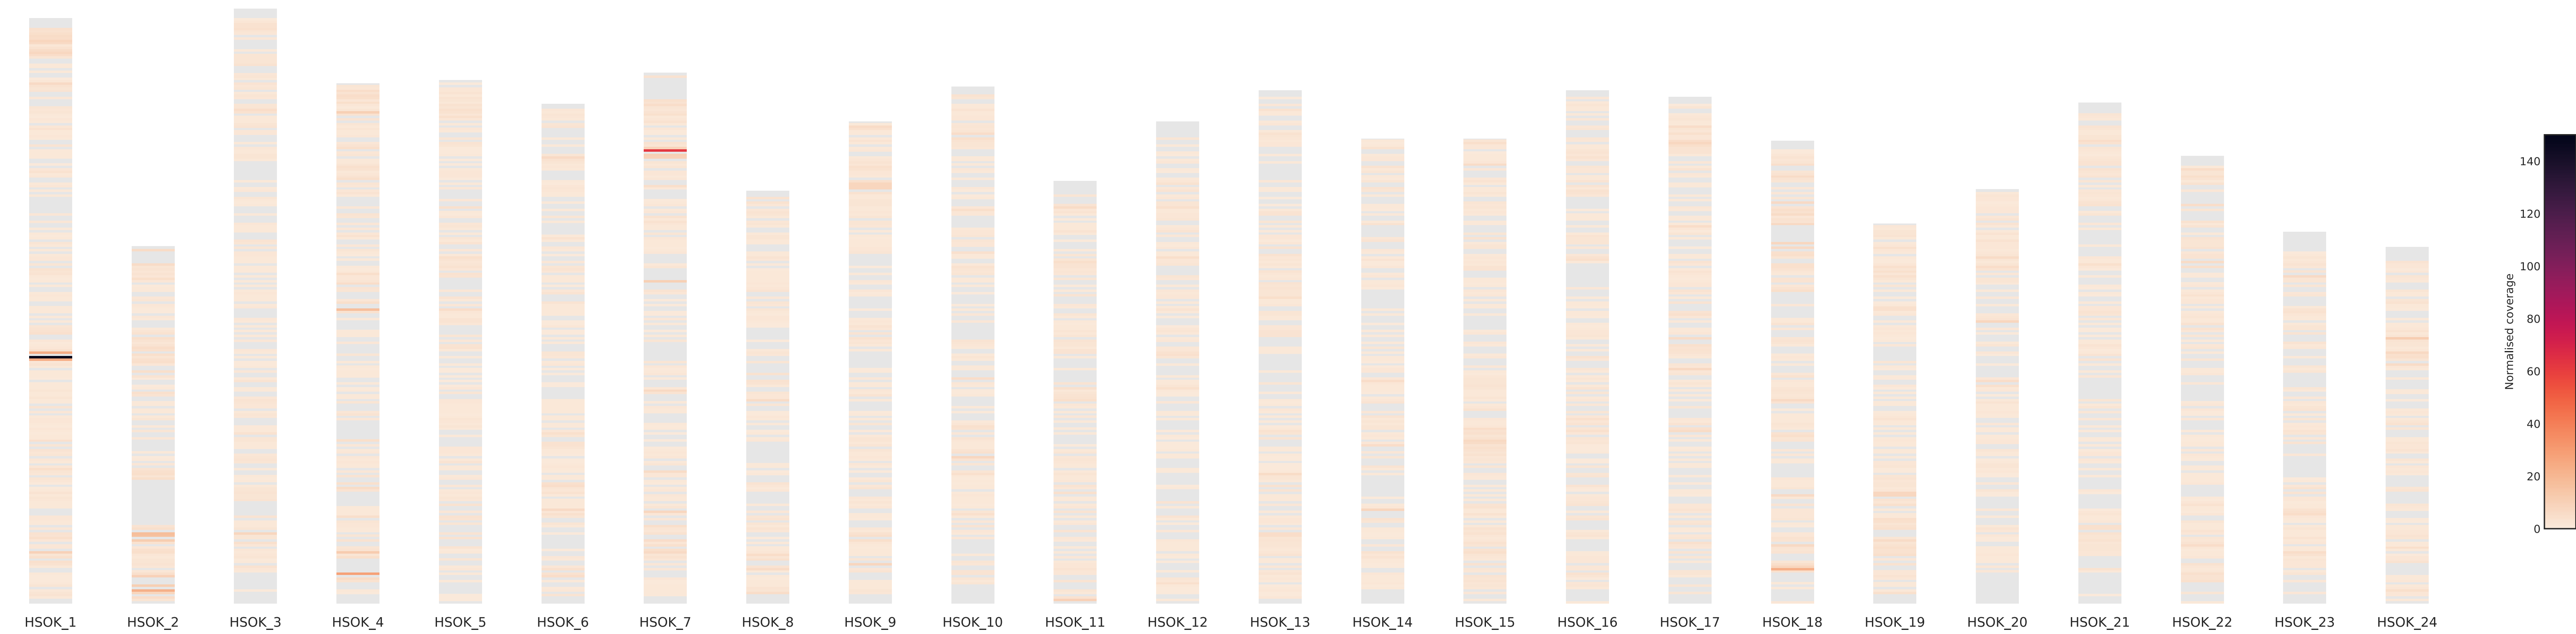

Karyotype of normalised coverage for reference HSOK with line 4-2

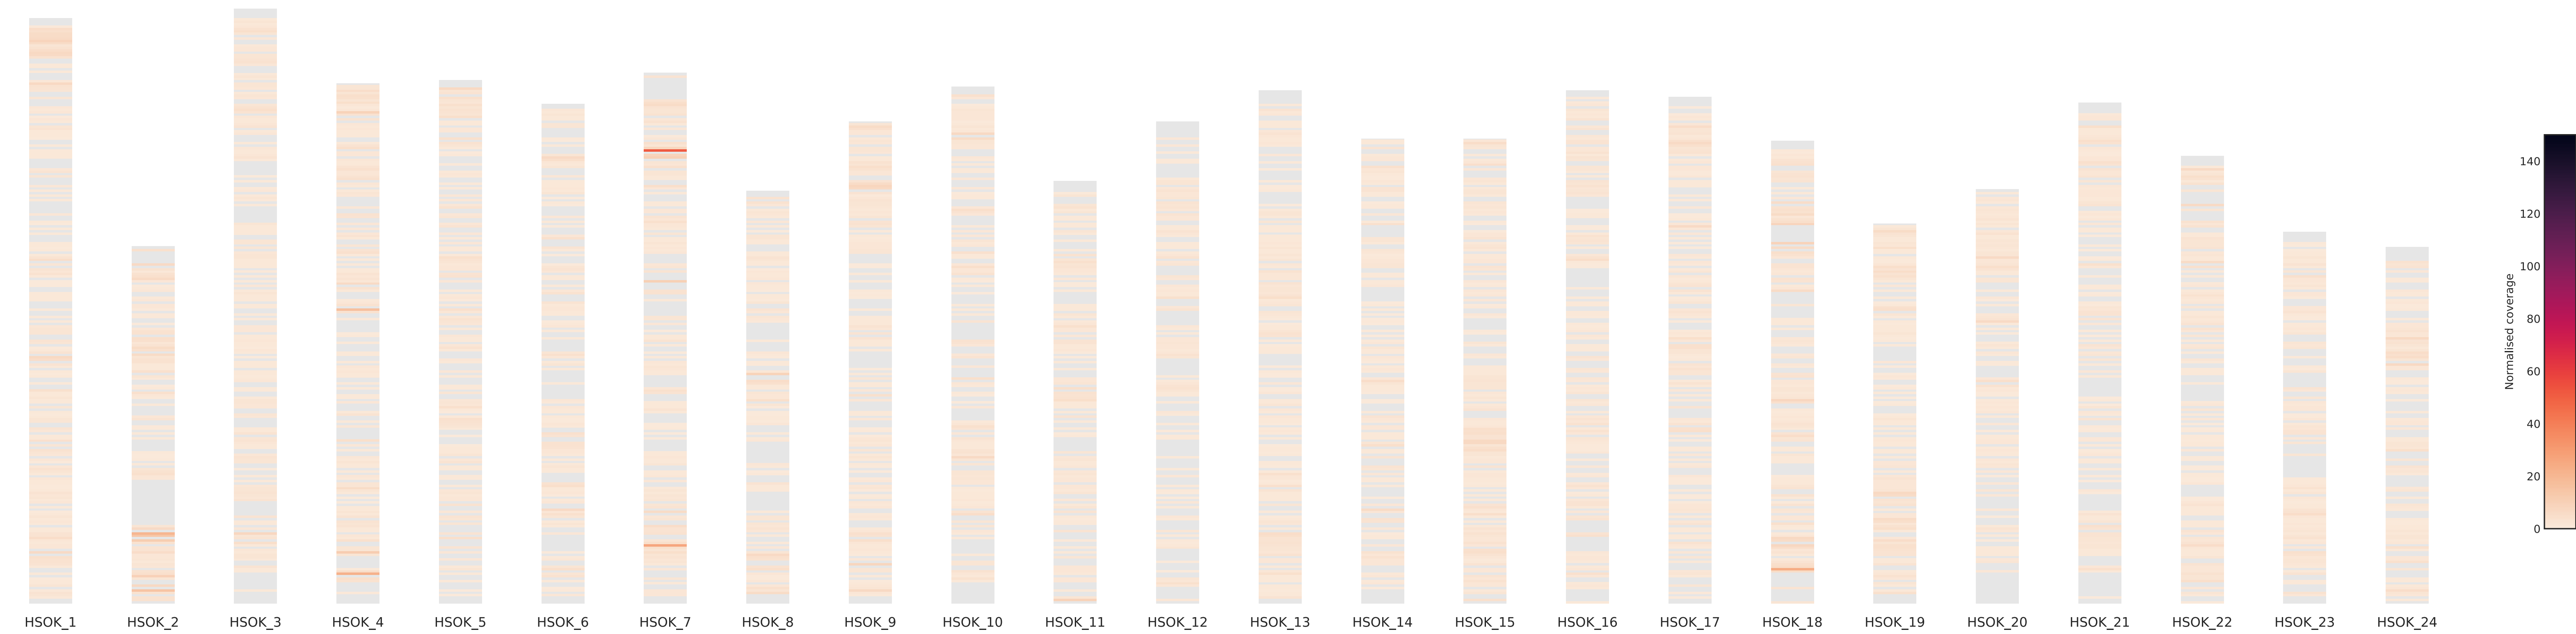

Karyotype of normalised coverage for reference HSOK with line 7-1

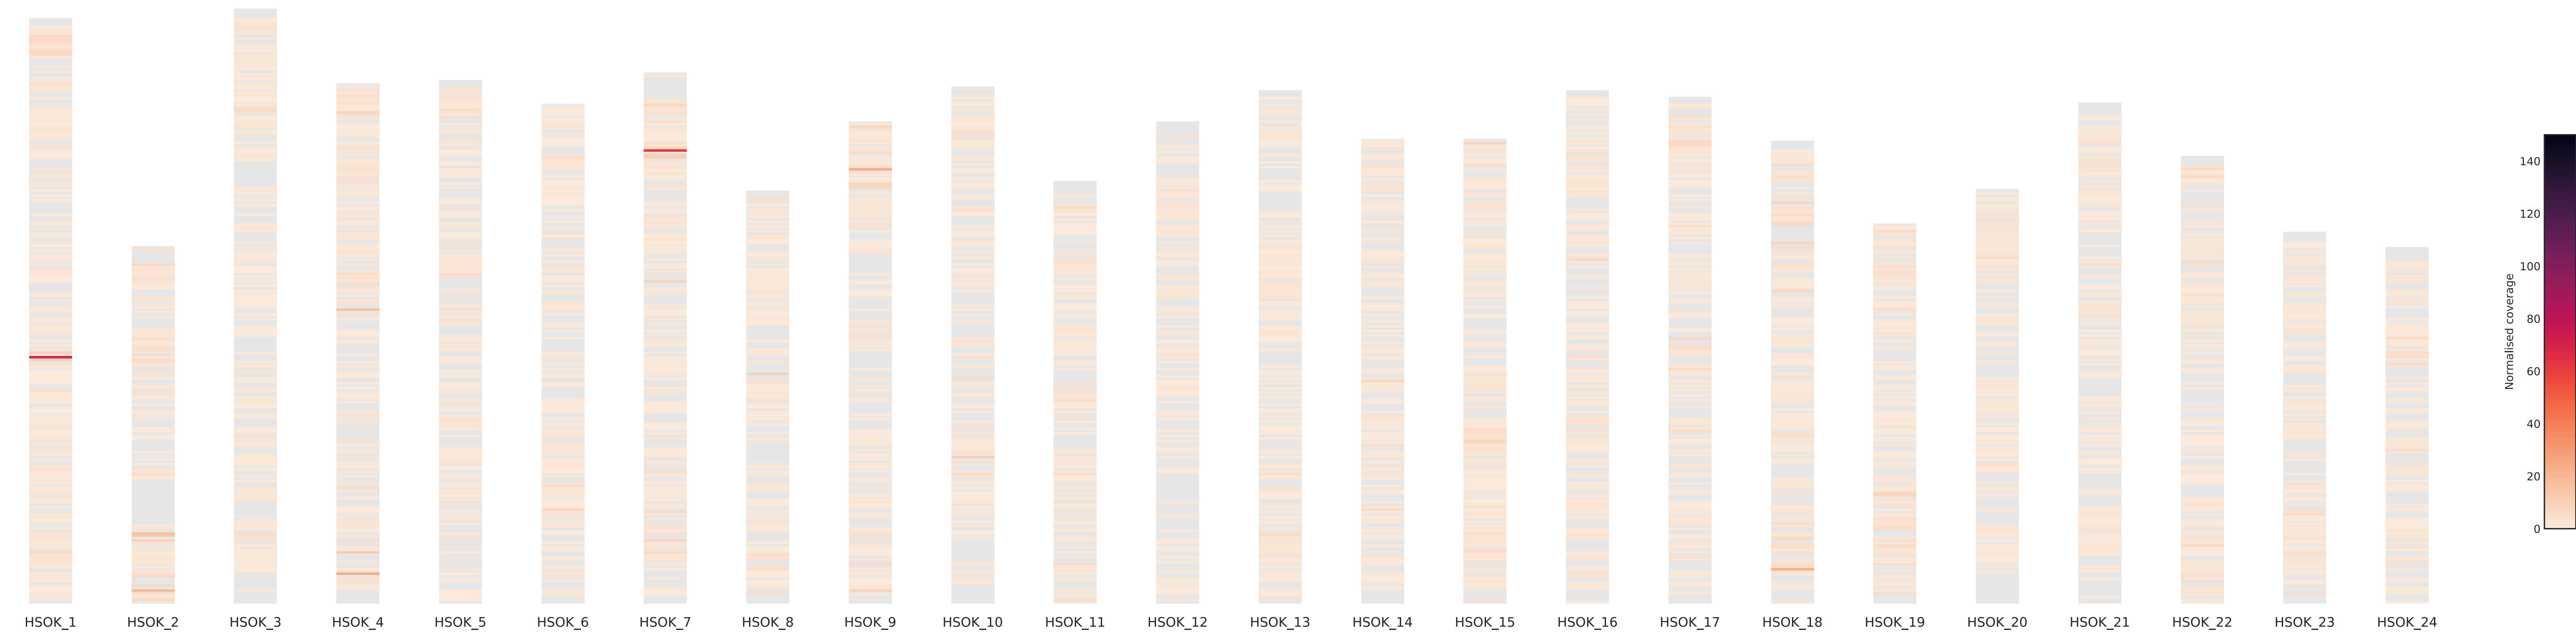

Karyotype of normalised coverage for reference HSOK with line 7-2

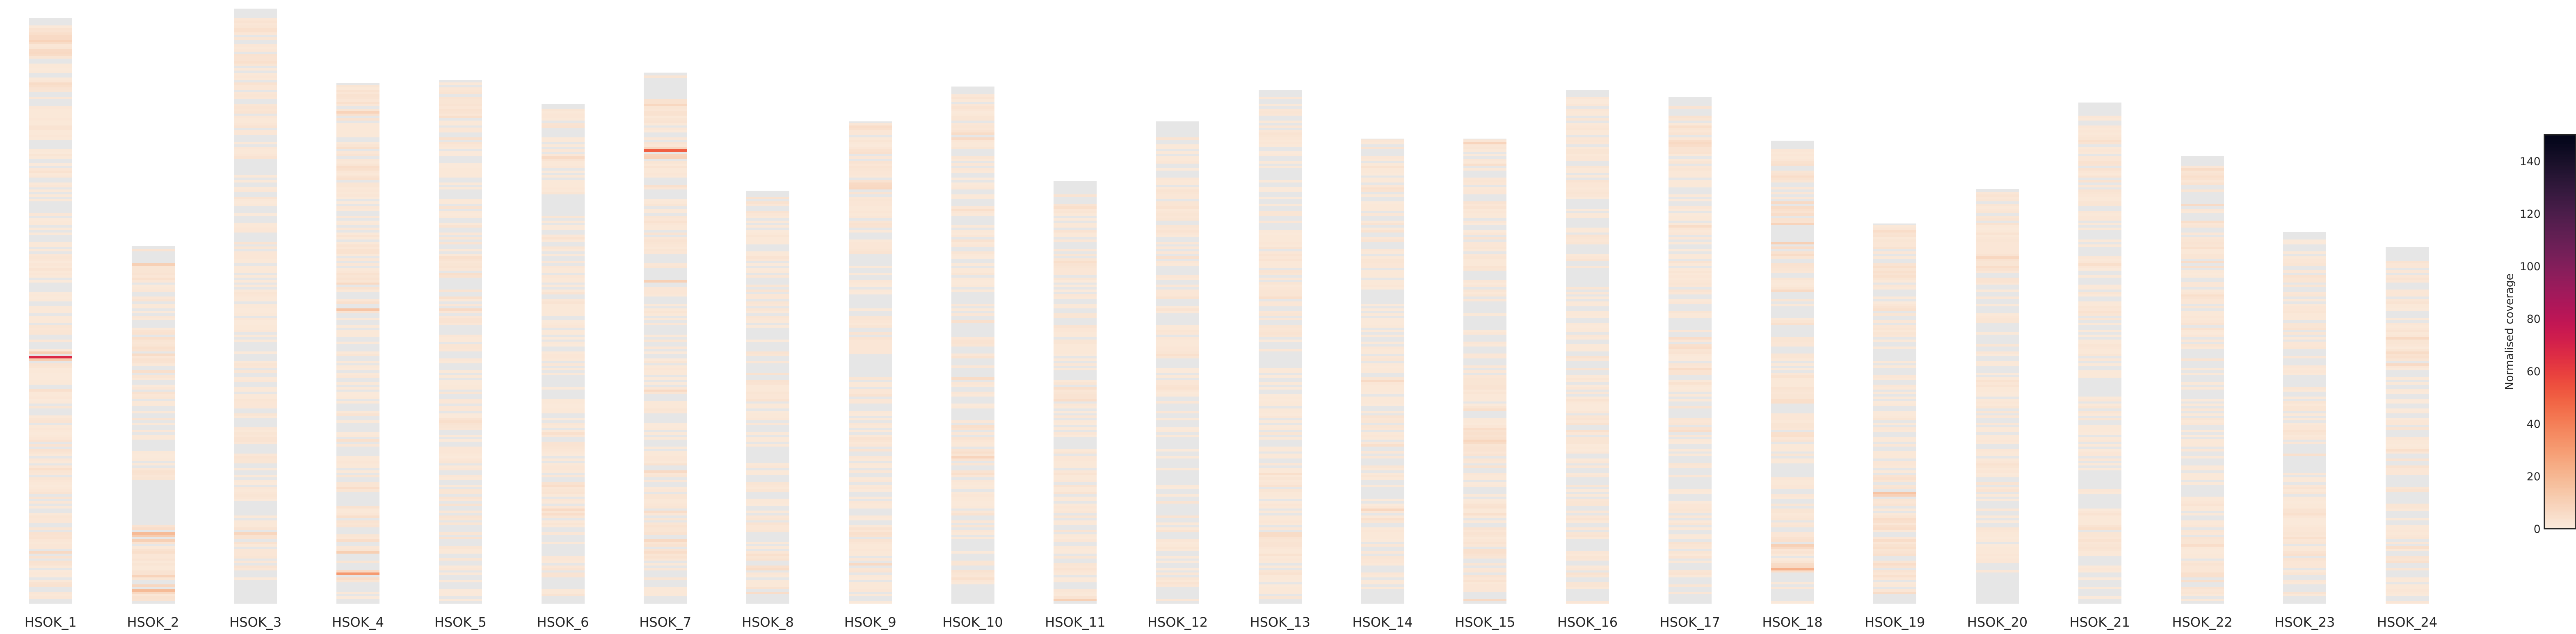



Karyotype of normalised coverage for reference HSOK with line 69-1

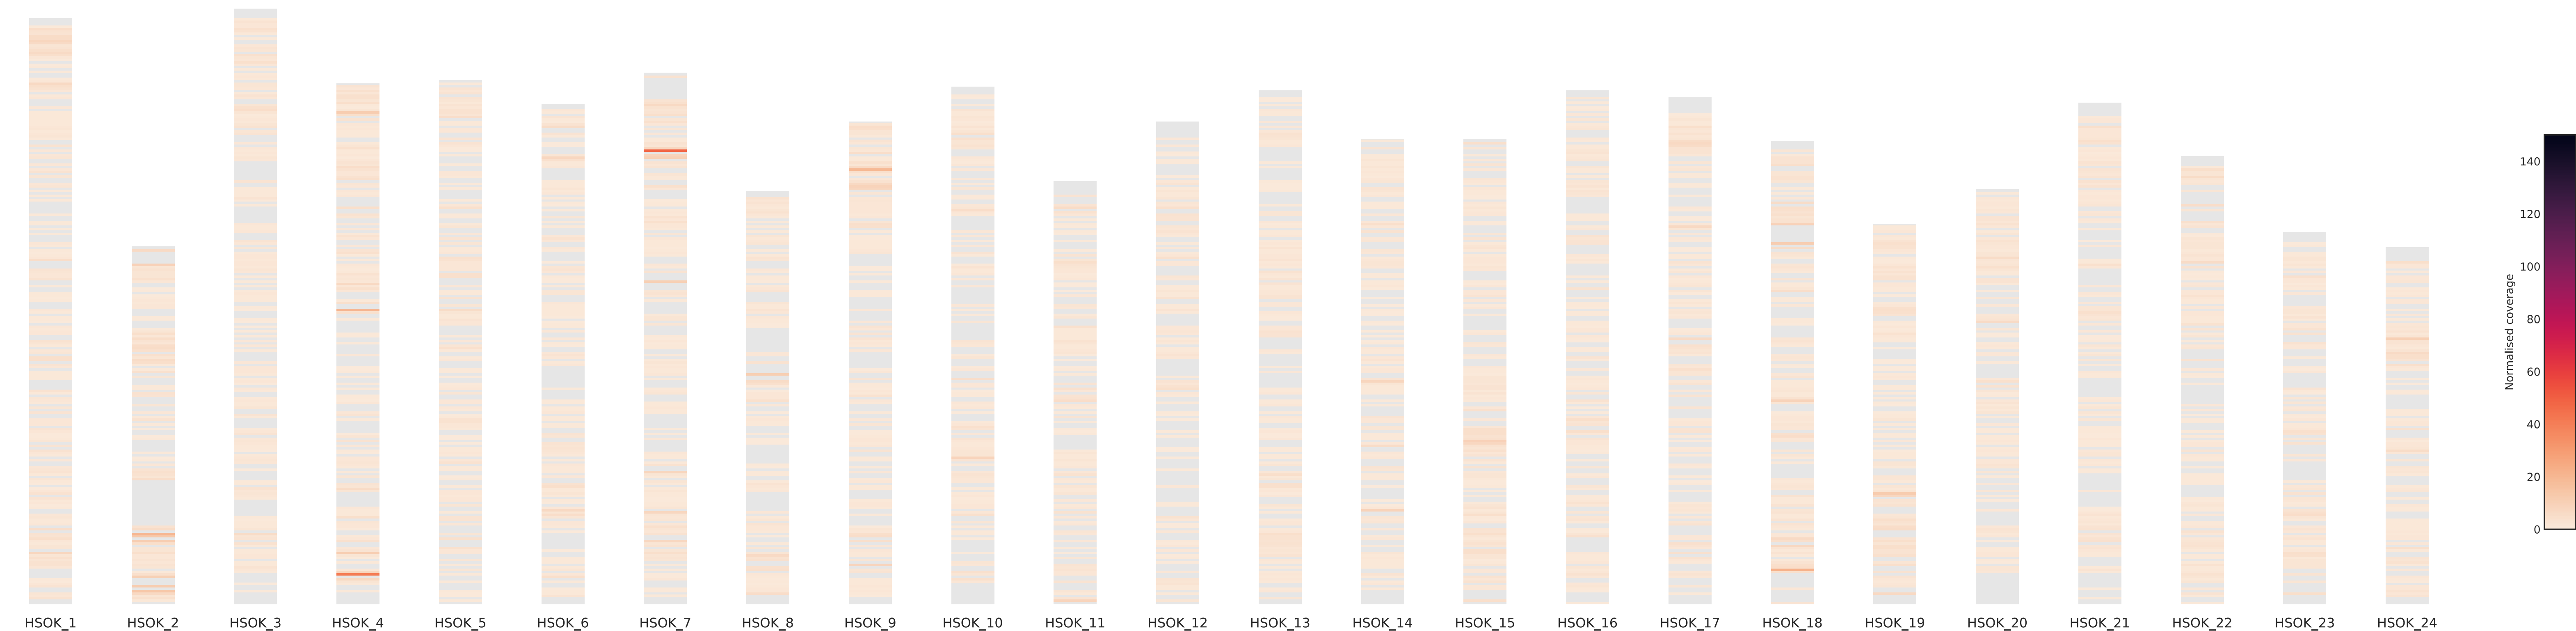



Karyotype of normalised coverage for reference HSOK with line 79-2

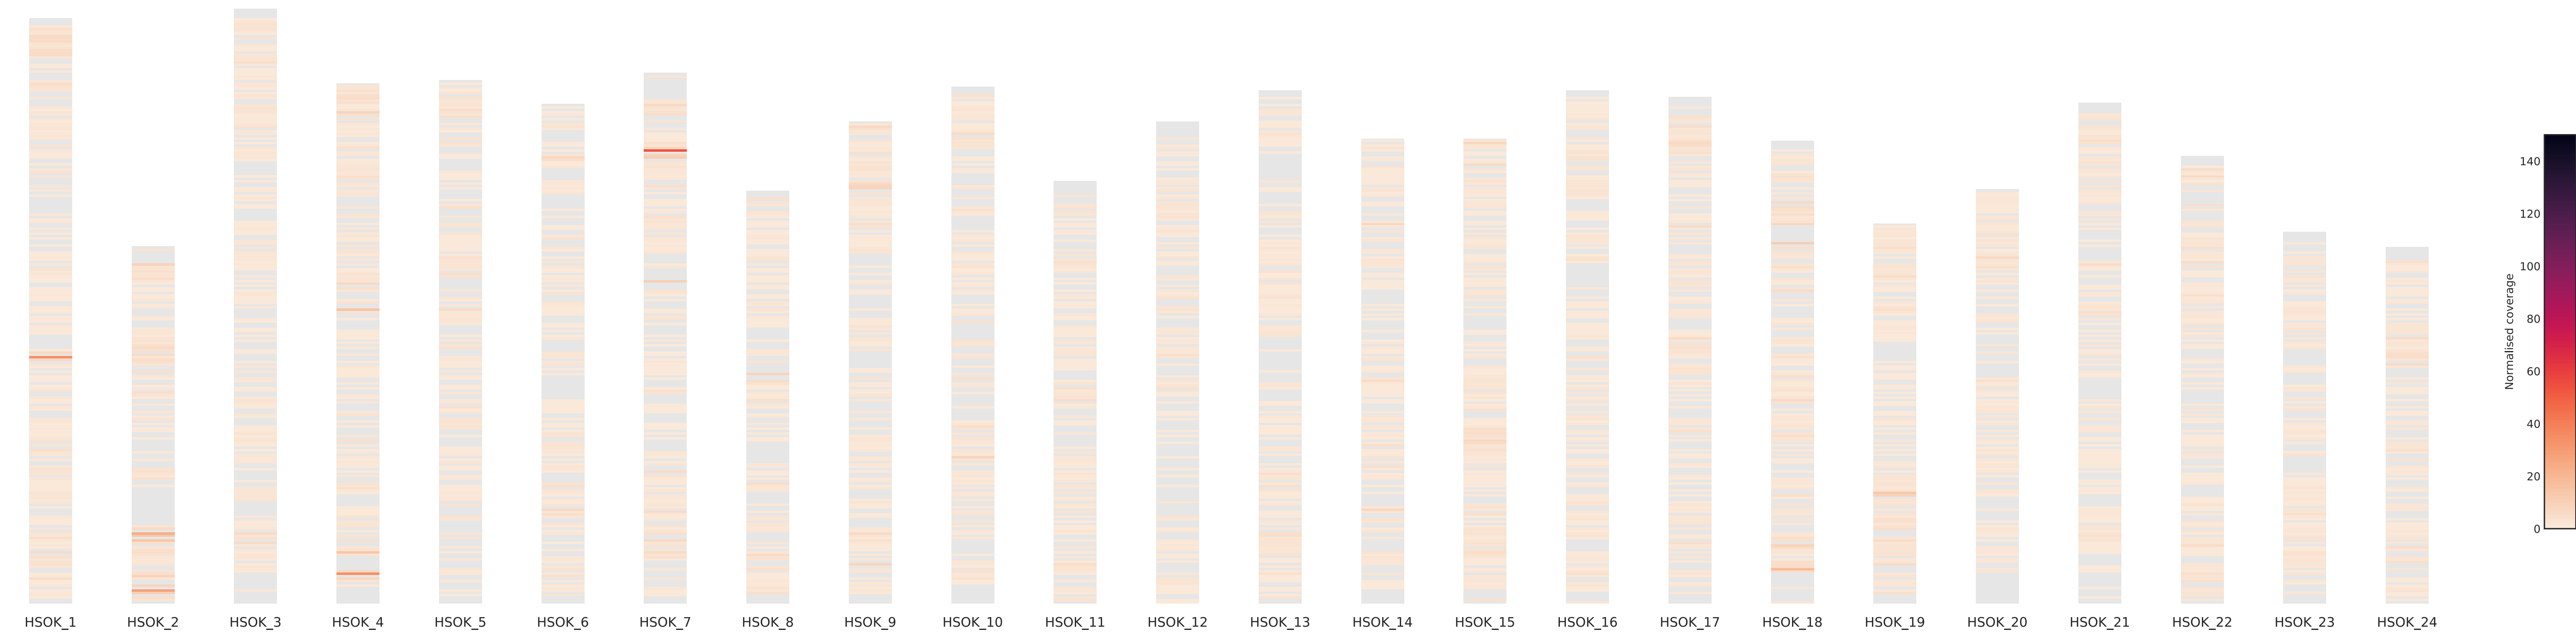

Karyotype of normalised coverage for reference HSOK with line 80-1

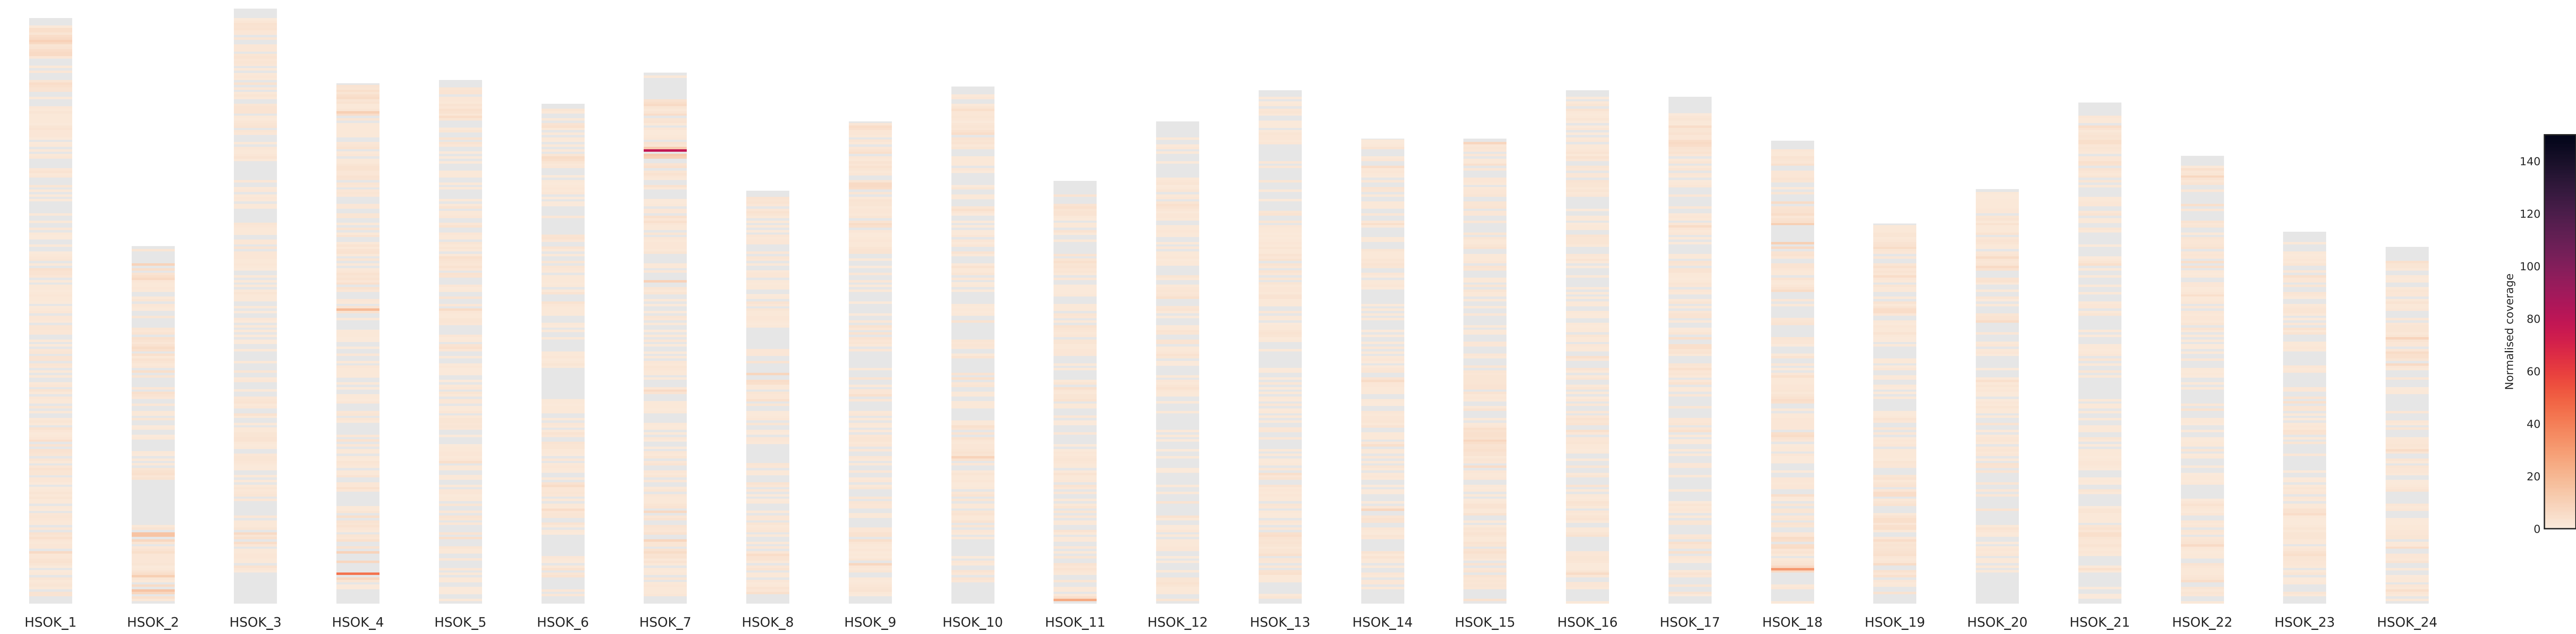

Karyotype of normalised coverage for reference HSOK with line 117-2

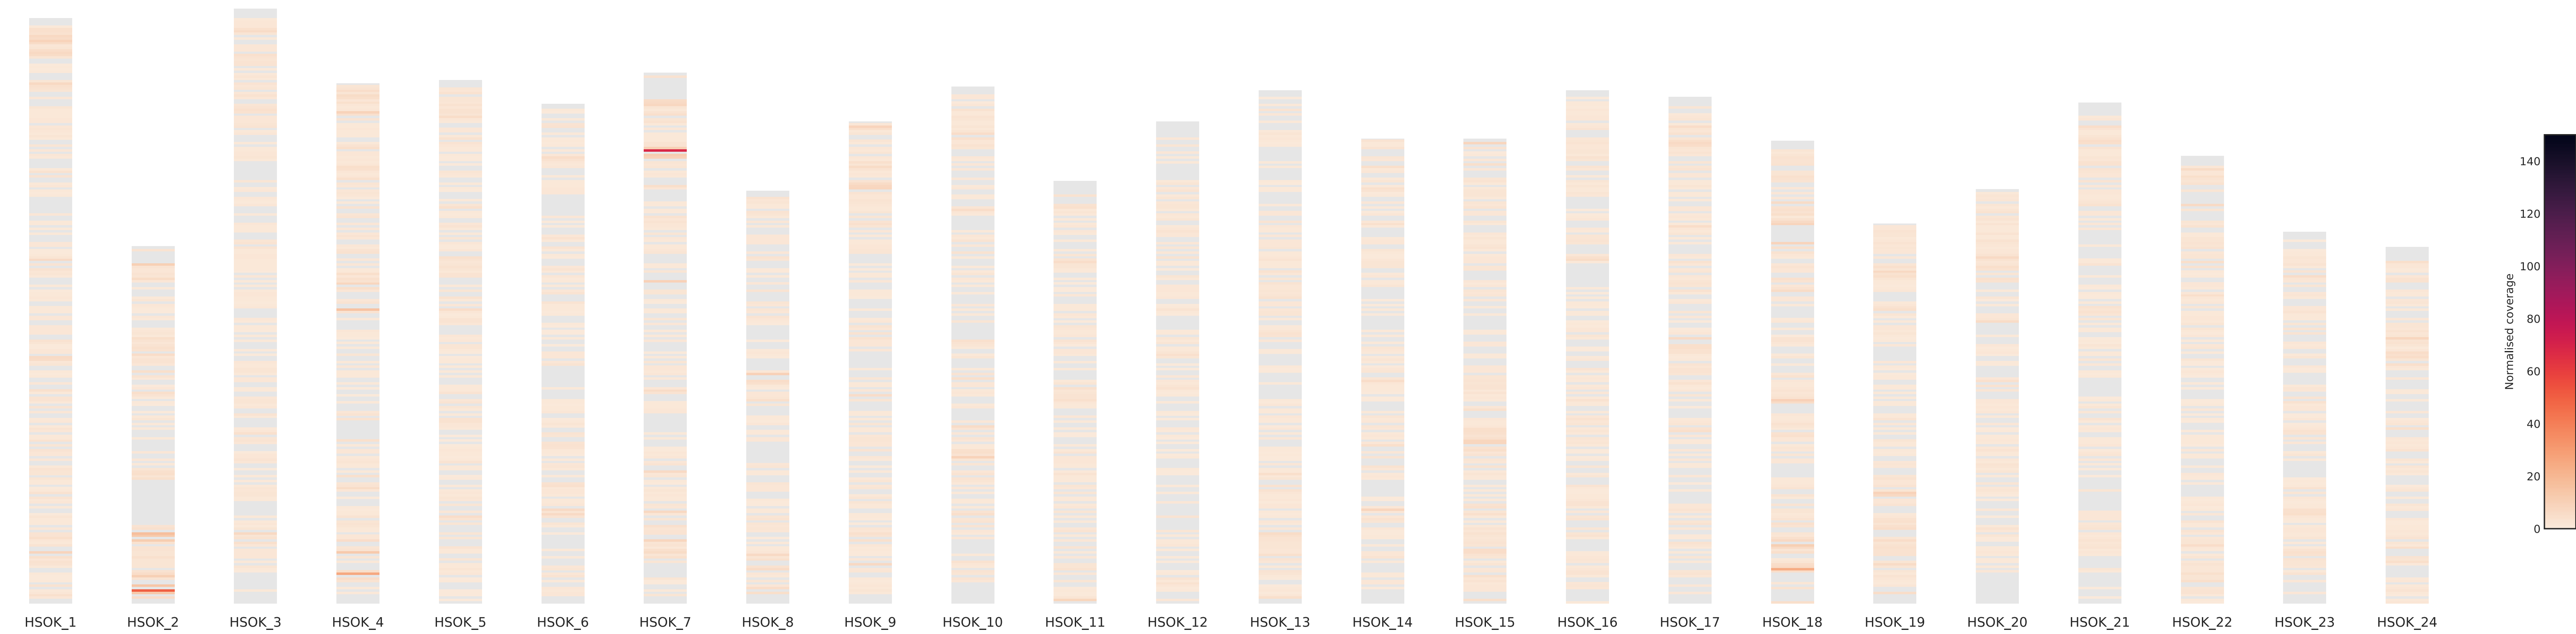

Karyotype of normalised coverage for reference HSOK with line 131-1

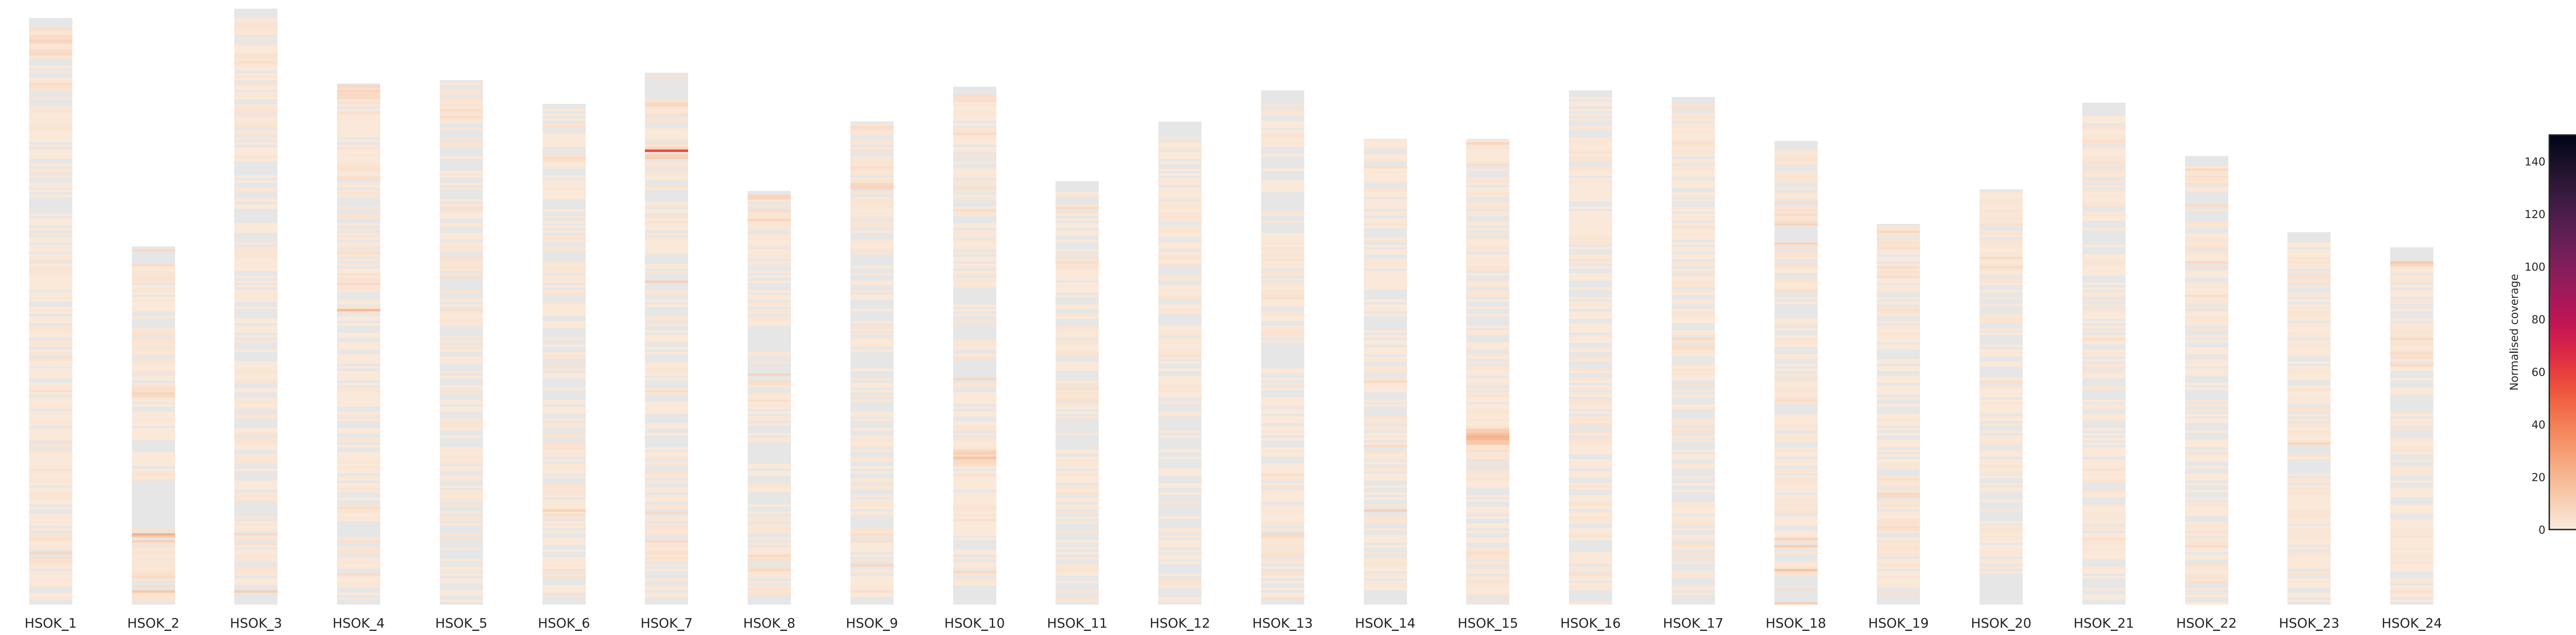

Karyotype of normalised coverage for reference HSOK with line 134-1

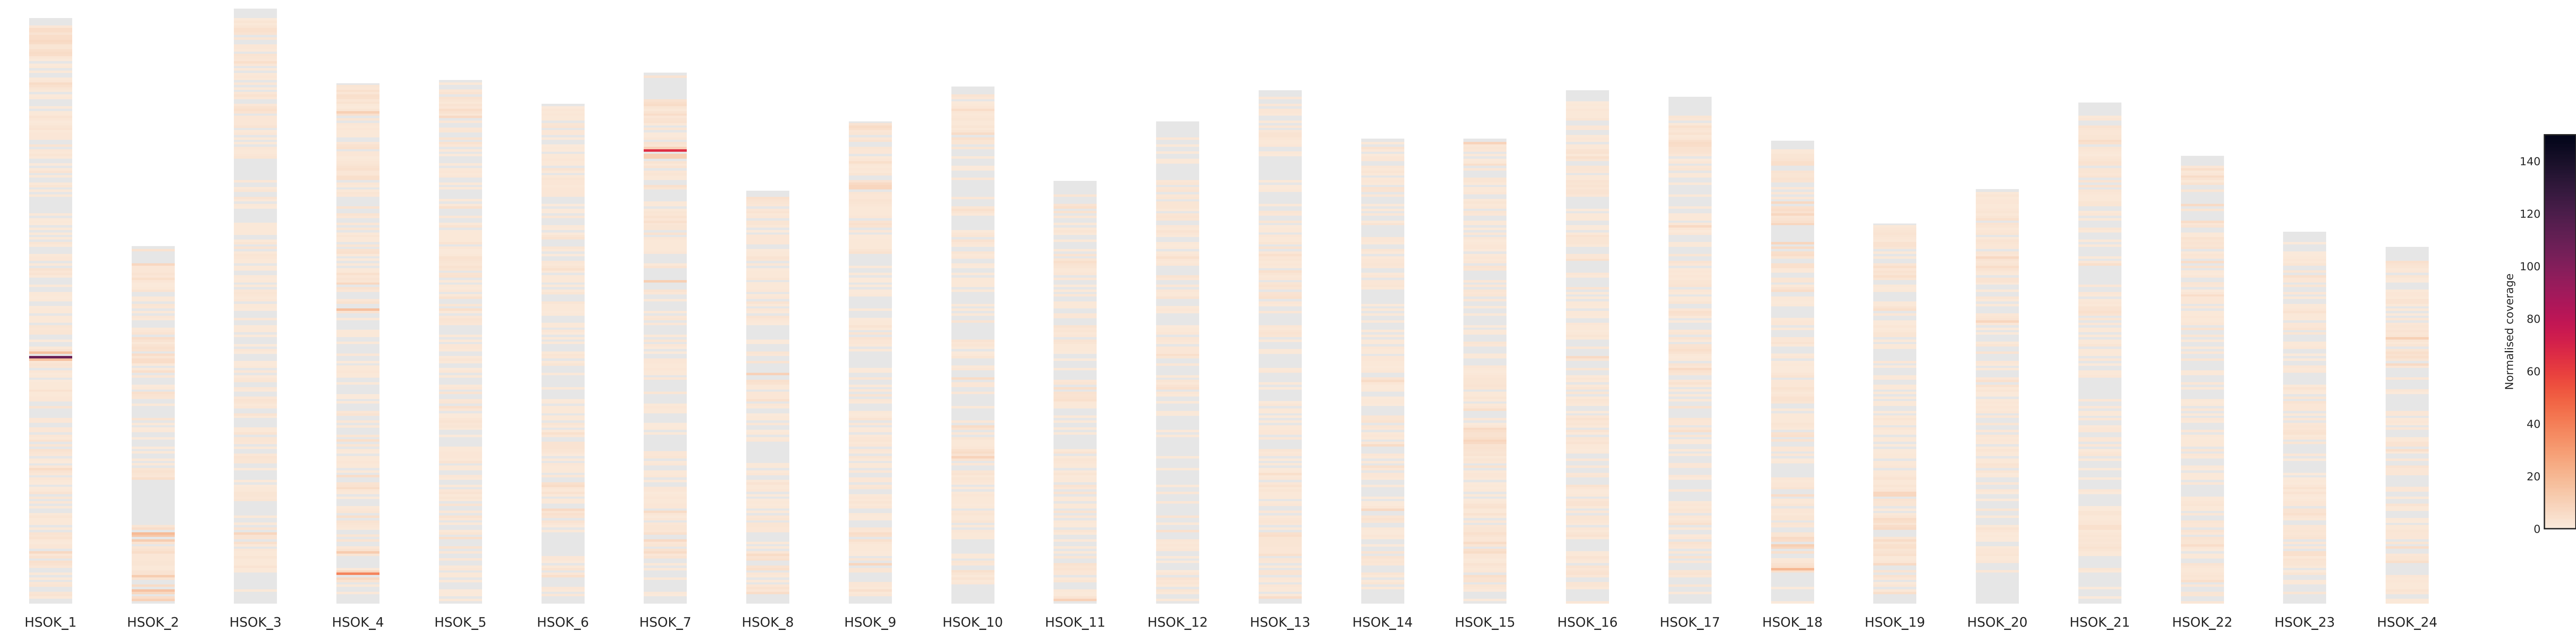

Karyotype of normalised coverage for reference HSOK with line 134-2

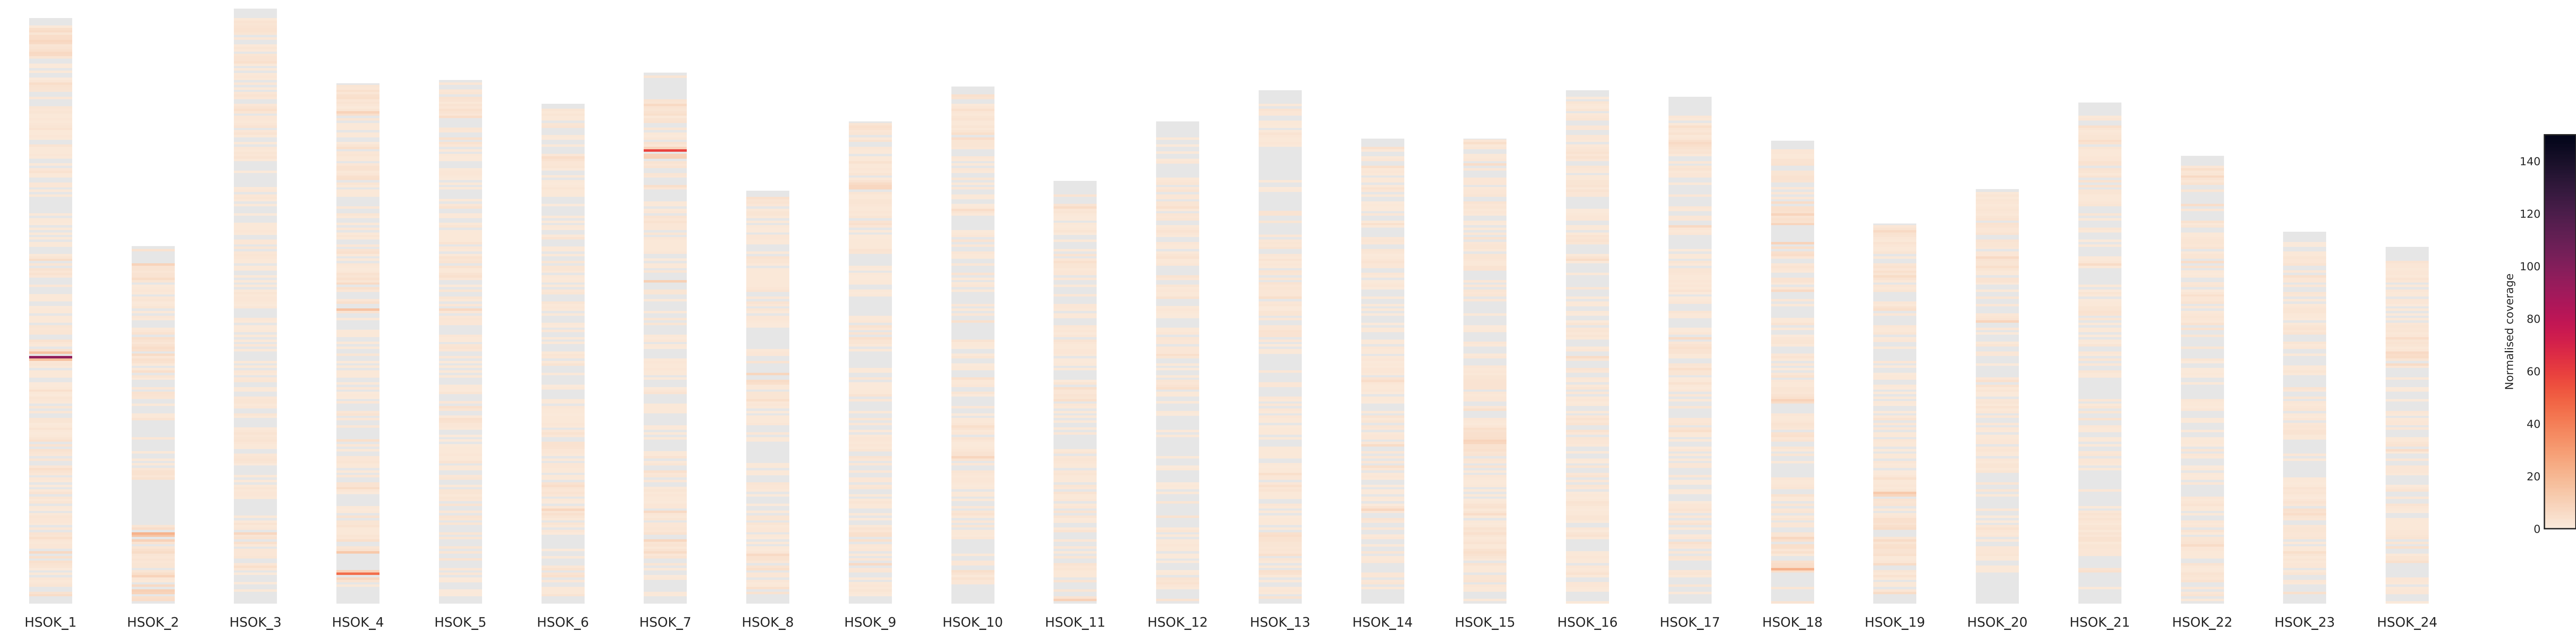

Karyotype of median normalised coverage for reference HSOK

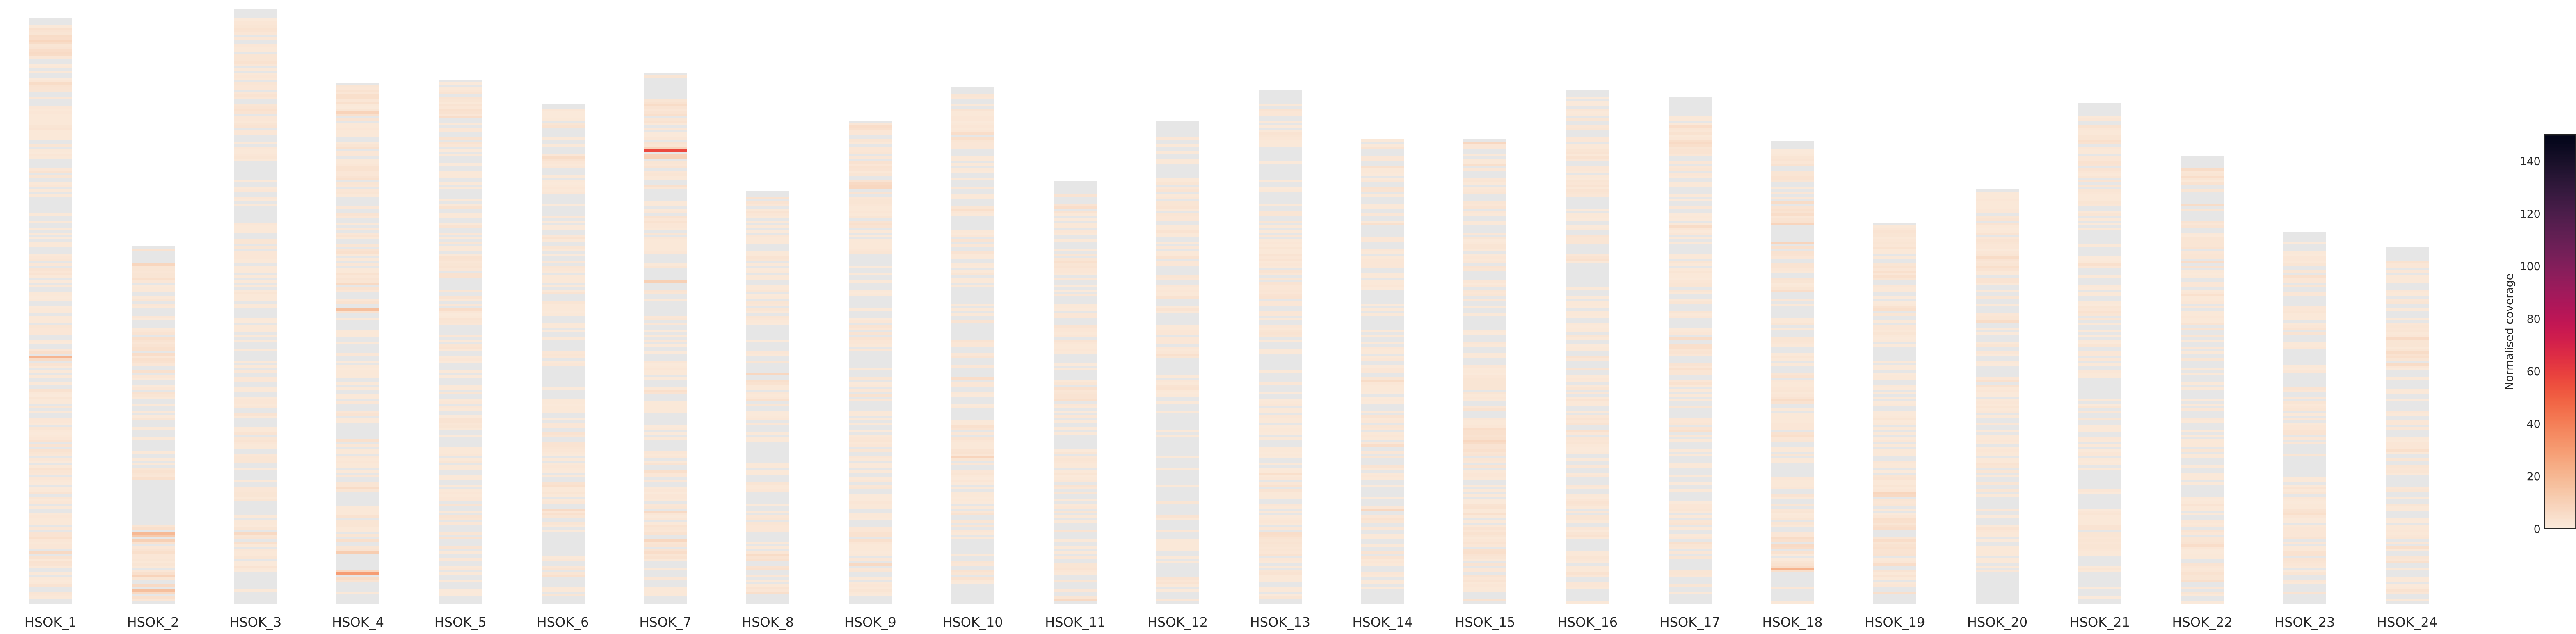

Supplement: Supplementary file [file media-2.pdf]
