# Supplementary material for: Genomic variations and epigenomic landscape of the Medaka Inbred Kiyosu-Karlsruhe (MIKK) panel
Source: bioRxiv or medRxiv preprint supplement (doi:10.1101/2021.05.17.444424), 2021-05-21
Supplement: Supplementary file [file media-1.pdf]

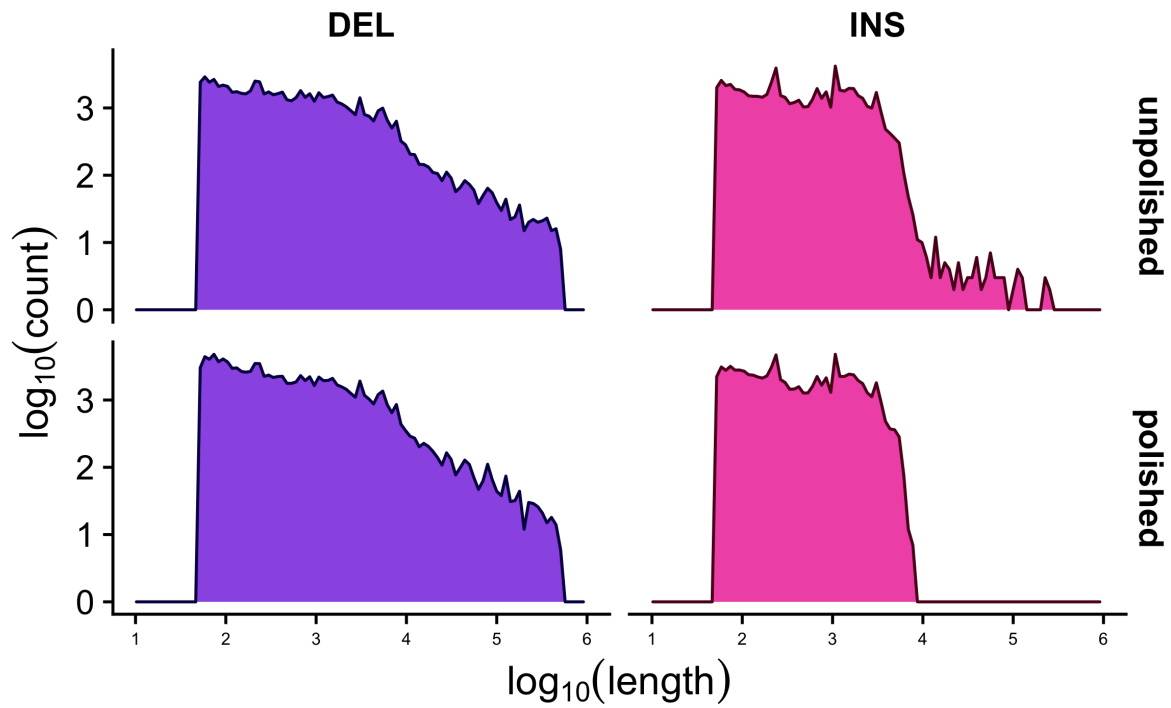

**Supplementary Figure 1:**  $\log_{10}$  lengths and counts of deletion (DEL) and insertion (INS) structural variants before and after polishing with SViper.

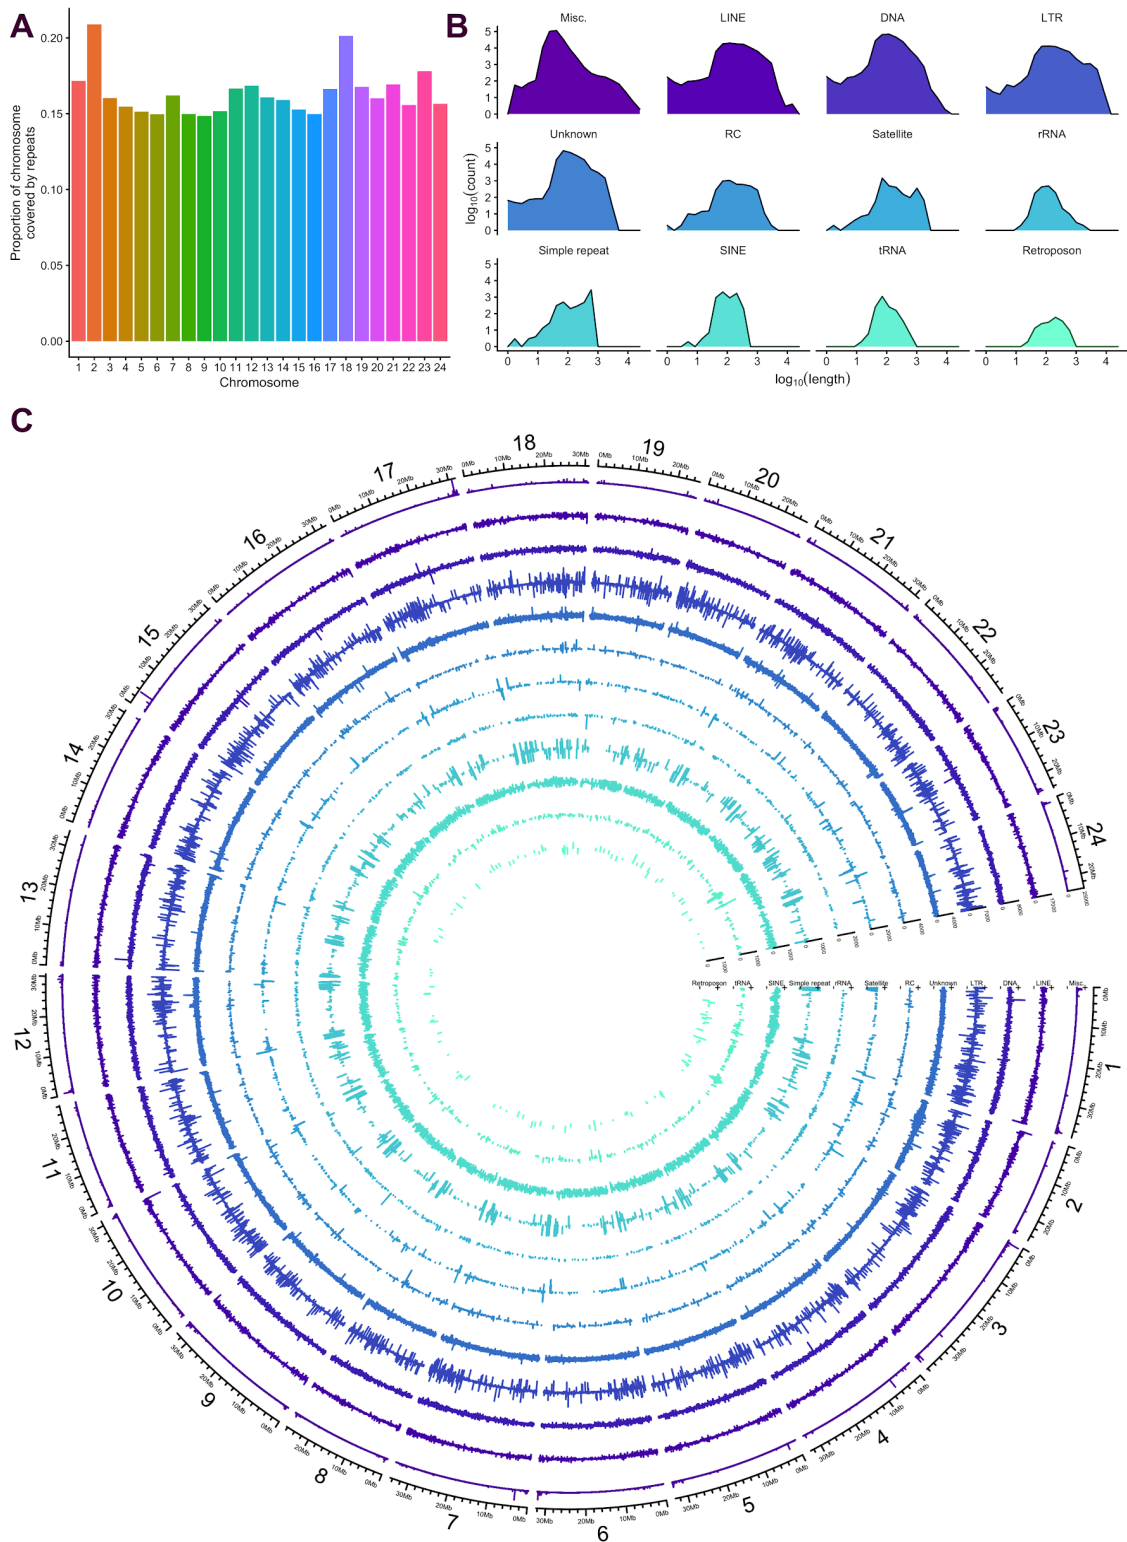

**Supplementary Figure 2:** Repeat content in the HdrR genome based on RepeatMasker results (*Methods*). *A.* Proportion of repeat content per-chromosome. *B.*  $\log_{10}$  of repeat lengths and counts per repeat class. “Misc” includes all repeats assigned to their own specific class, for example “(GAG)*n*” or “(GATCCA)*n*”. *C.* Circos plot showing repeat length (radial axes) by locus (angular axis) and repeat class (track). The code and methods used to generate the figure are set out here:

[https://birneylab.github.io/MIKK\\_genome\\_main\\_paper/20210409\\_repeats.html](https://birneylab.github.io/MIKK_genome_main_paper/20210409_repeats.html)
